# Supplementary material for: Trends in inequalities in the prevalence of dementia in the United States
Source: PubMed Central journal article supplement — Proc Natl Acad Sci U S A. 2022 Nov 7;119(46):e2212205119. doi: 10.1073/pnas.2212205119 (PMC9674270; doi:10.1073/pnas.2212205119), 2022-11-07
Supplement: pnas.2212205119.sapp.pdf [file pnas.2212205119.sapp.pdf]

## **Supplementary Information for** Trends in Inequalities in the Prevalence of Dementia in the U.S.

Péter Hudomiet, Michael D. Hurd, Susann Rohwedder.

\*Corresponding author: Péter Hudomiet.

**Email:** [Peter.Hudomiet@rand.org](mailto:Peter.Hudomiet@rand.org)

### **This PDF file includes:**

- Supplementary text
- Figures S1 to S7
- Tables S1 to S17
- SI References

## Supplementary Information Text

### Measuring Social Security Income

HRS respondents report their monthly and yearly income from Social Security retirement, spouse, or widow benefits in each survey wave (1). The reported values could be zero if the person did not have such income and missing if the person did not provide the value to the HRS.

To minimize measurement error in the self-reported values, we collapsed all reports from the panel into a single person-specific value using the following procedure:

1. We defined annual Social Security income as 12 times the reported monthly income. We used the directly reported yearly income if the monthly income was missing.
2. We inflation-adjusted all values to June 2015 dollars using CPI-U of the Bureau of Labor Statistics.
3. We took the average of all positive non-missing values reported after 65.
4. If the average was not defined (i.e., all reports were zeros or missing after age 65), we replaced it with the average of all positive non-missing values (irrespective of age).
5. If the average was still not defined, and all reports after age 65 were zeros, we used zero income. The remaining cases were considered missing.
6. Then, we repeated steps 1-5 for participants' spouses if the person had a spouse at least in one survey wave after age 65. In the rare cases that the person had multiple spouses, we used all spouse values as if they came from the same spouse.
7. For individuals observed at least once as having a spouse, we defined Social Security income as the maximum of the individual's own and the spouse's averages. If either one was missing, we used the non-missing value. If both were missing, Social Security income was considered missing, and it was imputed by Multiple Imputation within the MCMC model.

### Details of the Latent Variable Model

This section discusses the model we used to estimate the prevalence of dementia in the U.S. We used the same model in a companion paper (2) to estimate the lifetime risk of living with dementia for different durations.

We developed a joint longitudinal latent variable model of cognitive function, dementia, and survival. The model assumes that individual  $i$ 's cognitive function at time  $t$ , denoted by  $c_{it}^*$ , is an unobserved latent variable, and it evolves according to the equation

$$c_{it}^* = \beta x_{it} + \eta_{i0} + \eta_{i1} a_{it} + \varepsilon_{it}^c, \quad (1)$$

where  $x_{it}$  denotes observed covariates,  $a_{it}$  is age,  $\eta_{i0}$  is a random person-specific intercept,  $\eta_{i1}$  is a random slope (with respect to age), and  $\varepsilon_{it}^c$  is a noise term. Among the  $x_{it}$  covariates, we include a cubic function of age, sex, race and ethnicity, whether the person was born in the U.S., education, Social Security income, marital status, ever having a stroke, birth years interacted with all variables. The random-effects terms are assumed to be normally distributed and possibly correlated:

$$\begin{pmatrix} \eta_{i0} \\ \eta_{i1} \end{pmatrix} \sim N \left( \begin{pmatrix} 0 \\ 0 \end{pmatrix}, \begin{pmatrix} \sigma_{\eta_0}^2 & \rho \sigma_{\eta_0} \sigma_{\eta_1} \\ \rho \sigma_{\eta_0} \sigma_{\eta_1} & \sigma_{\eta_1}^2 \end{pmatrix} \right) \quad (2)$$

The noise term ( $\varepsilon_{it}^c$ ) is normally distributed and assumed to be uncorrelated with all other variables.

Individuals are assumed to have dementia if their cognitive function falls below 0, and they are cognitively impaired (without dementia) if their cognitive function is between 0 and 1. (These cutoff values are normalizations.) The cognitive status of individuals (dementia, cognitive impairment, normal) is only observed in the four waves of ADAMS.

The HRS includes a set of cognitive variables, such as immediate and delayed word recall. We assume that performance on these tests depends on individuals' latent cognitive function as well as on other predictor variables:

$$y_{it}^s = \alpha^s x_{it} + \phi^s c_{it}^* + \varepsilon_{it}^s \quad (3)$$

where  $s$  indexes the different available tests. In a baseline version of the model, there would be no covariates other than cognition in (3). By including other predictor variables in (3), we allow the cognitive test to vary in the population. For example, highly educated individuals may perform better on some cognitive tests, irrespective of their underlying cognitive abilities. The set of predictors in  $x_{it}$  is similar to (1). The first difference is that we only use a linear (as opposed to cubic) function of age. Second, we do not include the birth year in the equation. Third, for the cognitive tests in self-interviews, we added dummy variables indicating if it was the first time the person responded to the particular cognition questions. We hypothesized that individuals might learn how to answer these questions over time, and answering the cognition questions for the first time may be more challenging. Third, we added the immediate word recall test outcome as a predictor in the delayed word recall test because we found that performance on these two tests was closely related.

The HRS has many cognitive variables that could be used as outcome variables in (3). After investigating the correlation structure of the variables as well as patterns in their missing values, we aggregated the individual items into seven composite scores. Aggregation made it more likely that the outcome variables have a well-behaved distribution (such as normal), and it also simplified coding and speeded up the simulation of the model. The aggregated variables were defined as follows:

1. subjective limitations defined as the sum of a) subjectively assessed memory; b) instrumental activities of daily living; c) subjectively assessed health,
2. immediate word recall,
3. delayed word recall,
4. serial 7 subtractions,
5. mental status defined as the sum of a) backward counting; b) date of interview; c) naming the president; d) naming cactus; e) naming scissor,
6. interviewers' assessment of cognitive limitations,
7. proxy-reported cognitive problems defined as the sum of a) person ever gets lost; b) person ever wanders off; c) person cannot be left alone; d) person sees or hears things.

If any item of a composite score was missing, the composite variables were assumed to be missing as well (and they are imputed using multiple imputation as discussed below). The histograms of the composite scores are shown in Figure S5. The composite scores 1. and 2. were assumed to have normal distributions based on the histograms. Scores 3., 4., 5., and 7. were assumed to have truncated normal distributions. Scores 3. and 7. were truncated at zero, score 4. was truncated at zero and five, and score 5. was truncated at 9. Score 6. was modeled as an ordered probit.

Some cognitive tests are only available in self- or proxy-interviews. We used a selection equation to model interview type. The probability that individual  $i$  at time  $t$  answers through a proxy respondent is a probit:

$$\Pr(I_{it}^p = 1) = \Phi\left(f\left(x_{it}, c_{it}^*\right)\right) \quad (4)$$

where  $\Phi$  denotes the standard normal CDF, and  $f(\cdot)$  is a flexible function of cognition and other covariates: a cubic function of age, sex, race and ethnicity, whether the person was born in the U.S., education, Social Security income quartile, marital status, having had a stroke, interview wave dummies, latent cognitive function ( $c_{it}^*$ ), and interactions between interview wave dummies. These interaction terms were added because we found in our earlier research that HRS conducted fewer and somewhat more selective proxy-interviews after 2006 (3). Survival is modeled using a Gompertz model. The hazard of death at time  $t$  is

$$h_i(t) = \lambda_{0i} \exp(\lambda_1 t) \quad (5)$$

$$\ln \lambda_{0i} = \omega_0 + \omega_1 x_i + \omega_2 \eta_{i0} + \omega_3 \eta_{i1} \quad (6)$$

Covariates enter the shape parameter of survival ( $\lambda_{0i}$ ). We only included time-invariant covariates in (6): sex, race and ethnicity, birthplace, education, Social Security income quartile,

birth-year, the two random effects in the cognition equation ( $\eta_{i0}$  and  $\eta_{i1}$ ), and various interaction terms between birth-years and demographics. The model allowed correlations between cognition and survival flexibly by adding the random effects terms.

We use a continuous-time model, but interview dates are only observed to the precision of months in the publicly available HRS data. Individuals were selected into ADAMS via stratified sampling to increase the number of cases of dementia. We model selection into the ADAMS samples based on the published selection strata (4).

1,770 individuals were selected to participate in the first wave of ADAMS. Of them, 856 individuals (48.4%) were successfully diagnosed, 227 individuals (12.8%) died before diagnosis, and 687 (38.8%) refused to participate. The probability of refusal was modeled as probit, and it was a function of age and cognition. In the refusal model, we used the age of respondents at the time of the ADAMS interview. This age, however, was not available for those who did not respond, so their age at their potential interview was imputed using multiple imputation. We assumed that the time between the last HRS interview and their potential ADAMS interview followed a lognormal distribution:

$$\ln T_{it} = \tau_0 + \tau_1 x_{it} + \tau_2 c_{it}^* + \varepsilon_{it}^T \quad (7)$$

We included age, cognition, an indicator that the previous HRS interview was in 2002, and interactions of this variable with age and cognition. Adding this indicator was necessary because the HRS was significantly slower in scheduling ADAMS interviews at the beginning of their field period.

The timing of interviews and interview refusals were modeled analogously in the 2<sup>nd</sup>, 3<sup>rd</sup>, and 4<sup>th</sup> waves of ADAMS.

The HRS cognitive tests were sometimes missing (Table S17), and these values were modeled by multiple imputation using equation (3). We found evidence that cognitively less able individuals were more likely to have missing values, so we added selection equations for the probabilities of missing values, which we modeled as probits. Apart from basic demographic covariates and cognition, we included survey wave dummies, and their interactions with cognition, because we saw evidence that missing rates fluctuated over time in the HRS. The final specifications were:

$$\Pr(y_{it}^s = .) = \Phi(\psi_0^s + \psi_1^s x_{it} + \psi_2^s w_{it} + \psi_3^s c_{it}^* + \psi_4^s w_{it} \times c_{it}^*) \quad (8)$$

where  $w_{it}$  indicates the survey wave.

Missing predictor variables (such as education and Social Security income quartile) were also imputed using multiple imputation. Because very few predictor variables were missing, we assumed a simple categorical distribution for the prior distribution of these variables.

The model was estimated by Markov Chain Monte Carlo using 2,000,000 simulation draws, and the first 10% burn-in draws were discarded. Table S13 shows the model outcome. Figure S7 shows the time series plots and histograms of the MCMC simulation draws of selected coefficients and statistics. The draws are highly correlated over time, a common issue in MCMC models. Still, the 2 million draws appear to be enough to recover the distribution of the parameters accurately: The time series plots fluctuate around the mean, and the histograms are Bell-shaped.

This model is computationally intensive, but it substantially increases the precision of the estimates compared to cross-sectional models used in the literature. The final version ran for about three weeks on a RAND Unix server. The MCMC model directly produces the standard errors of all parameters.

### Estimating Dementia Prevalence and Other Statistics Based on the Model

The cognition model (discussed in the previous section) can estimate the prevalence of dementia in the population and other interesting statistics. These statistics can be estimated together with the model coefficients. In each MCMC simulation draw, we used equation (1) to draw a cognition value for each person at each wave. For each person-wave observation in our data, we estimated the person-wave-specific expected value of cognition (i.e., our point-estimate of cognition for that person-wave observation) within the MCMC model. The histograms of the point estimates are shown in the top panel of Figure S6, and the bottom panel shows the histogram of the wave-to-wave changes in cognition. We also took the weighted average of the simulation draws in the

population and subpopulations by sex etc., in each simulation draw. The point estimate for dementia prevalence is defined as the mean of these values across the simulation draws. The top four panels of Figure S7 show the time-series plots (over the simulation draws) and histograms of dementia prevalence in 2000 and 2016.

One drawback of estimating these statistics together with the model parameters is that one needs to estimate the entire model to recover the statistics, which is time-consuming. To facilitate the use of our model, we saved 901 “representative” simulation draws of latent cognition for each person and period. More precisely, after discarding the first 10% burn-in draws, we saved every 2000th simulation draws of the remaining 1.8 million. The means of these values in different subgroups were very close (to the third digit) to the means based on the total 1.8 million simulation draws. Thus, they can estimate other statistics that were not saved during estimation. We used this approach (i.e., the 901 draws) to implement the regression-based adjustments of the prevalence estimates presented in the paper.

### **Testing the Model on Synthetic Data and Comparisons to the Literature**

We tested our statistical methodology on synthetic data with known parameter values. We used a larger simulated dataset than the HRS (N=30,000) to increase precision. We simulated a random dataset with known parameter values that followed the HRS-ADAMS design. Then we estimated our model using the same code we used for our final model. Table S14 shows the actual and estimated model parameter values. The estimates track the true values very closely. Tables S15 and S16 show actual and estimated dementia prevalence by survey wave, sex, and age in the synthetic data. Again, the estimated statistics track the actual values very closely.

Table S11 shows dementia prevalence estimated in the U.S. among individuals aged 71-years and above by sex and weighted to be population representative. The first column shows Plassman et al.’s (5) estimates: the prevalence rates as directly observed in the first ADAMS wave. Because the ADAMS sample is selected from the nationally representative HRS, the Plassman rates have been used in the literature as the gold standard estimates to which other algorithms and estimation methods can be compared (6). The second column shows estimates based on our model. The point estimates are closely comparable in the total sample and by sex. Still, our estimates’ 95% confidence intervals are considerably narrower, thanks to the larger sample and the additional longitudinal information we use. In the total sample, the width of our confidence interval was 1.3 percentage points (ppts), compared to 5 ppts in Plassman. We note that our confidence intervals consider the uncertainties from the model estimation and averaging. We used our model to estimate trends in the prevalence of dementia and found a decrease from 11.8% in 2000 to 9.1% in 2012. This decline is similar to reductions in prevalence that others have found. For example, Langa et al. (7) reported prevalence rates of 11.6% in 2000 and 8.8% in 2012.

### **Adjusting the Sample to Demographic Changes**

The paper presented dementia prevalence estimates after adjusting the sample to trends in age, education, and other risk factors of dementia. Panel A of Figure 1 shows trends in dementia prevalence in the 65+-year-old population after adjusting the mean of age in each survey wave to be equal to the sample mean over the entire time period. To achieve this, we ran a regression model of dementia on a cubic function of age interacted with indicators of each survey wave. Then we calculated the average predicted dementia prevalence holding age at the sample mean, using Stata’s margins command. The other Panels in Figures 1 used the same procedure within each population subgroup.

In Tables 1 and 2, we presented dementia prevalence estimates after adjusting the sample to changes in the distributions of an expanded set of factors. In the most comprehensive adjustment model (“Age-, education-, demographics, & health adjusted”), we ran a regression of dementia on sex, education, Social Security income quartiles, race and ethnicity, birthplace (U.S. born vs. not), marital status (single vs. married), cardiovascular risk factors (hypertension, diabetes, stroke, heart problems), a cubic function of age, a complete interaction between education, the demographic and health covariates and the age polynomial, a linear time trend, and the time trends interacted with all variables above, including the interaction terms. After estimating the model, we calculated its predicted values in 2000 and 2016 after keeping all variables at their

means (calculated over the entire 2000-2016 period) either in the total population or in specific subgroups. The tables also presented alternative adjustment models with fewer covariates. We adjusted the male and female samples separately for the other models in Tables 1 and 2. The regression models used for this were analogous to the “All, adjusted” model, except that we did not include sex indicators.

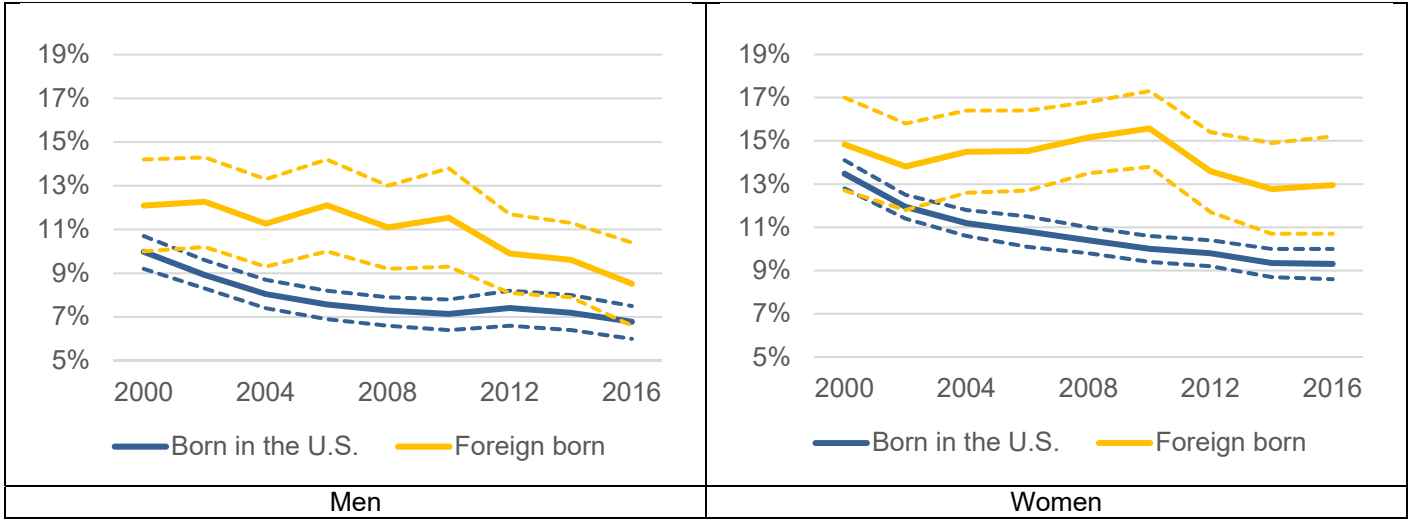

**Fig. S1.** Trends in the age-adjusted prevalence of dementia from 2000 to 2016 by sex and birthplace.

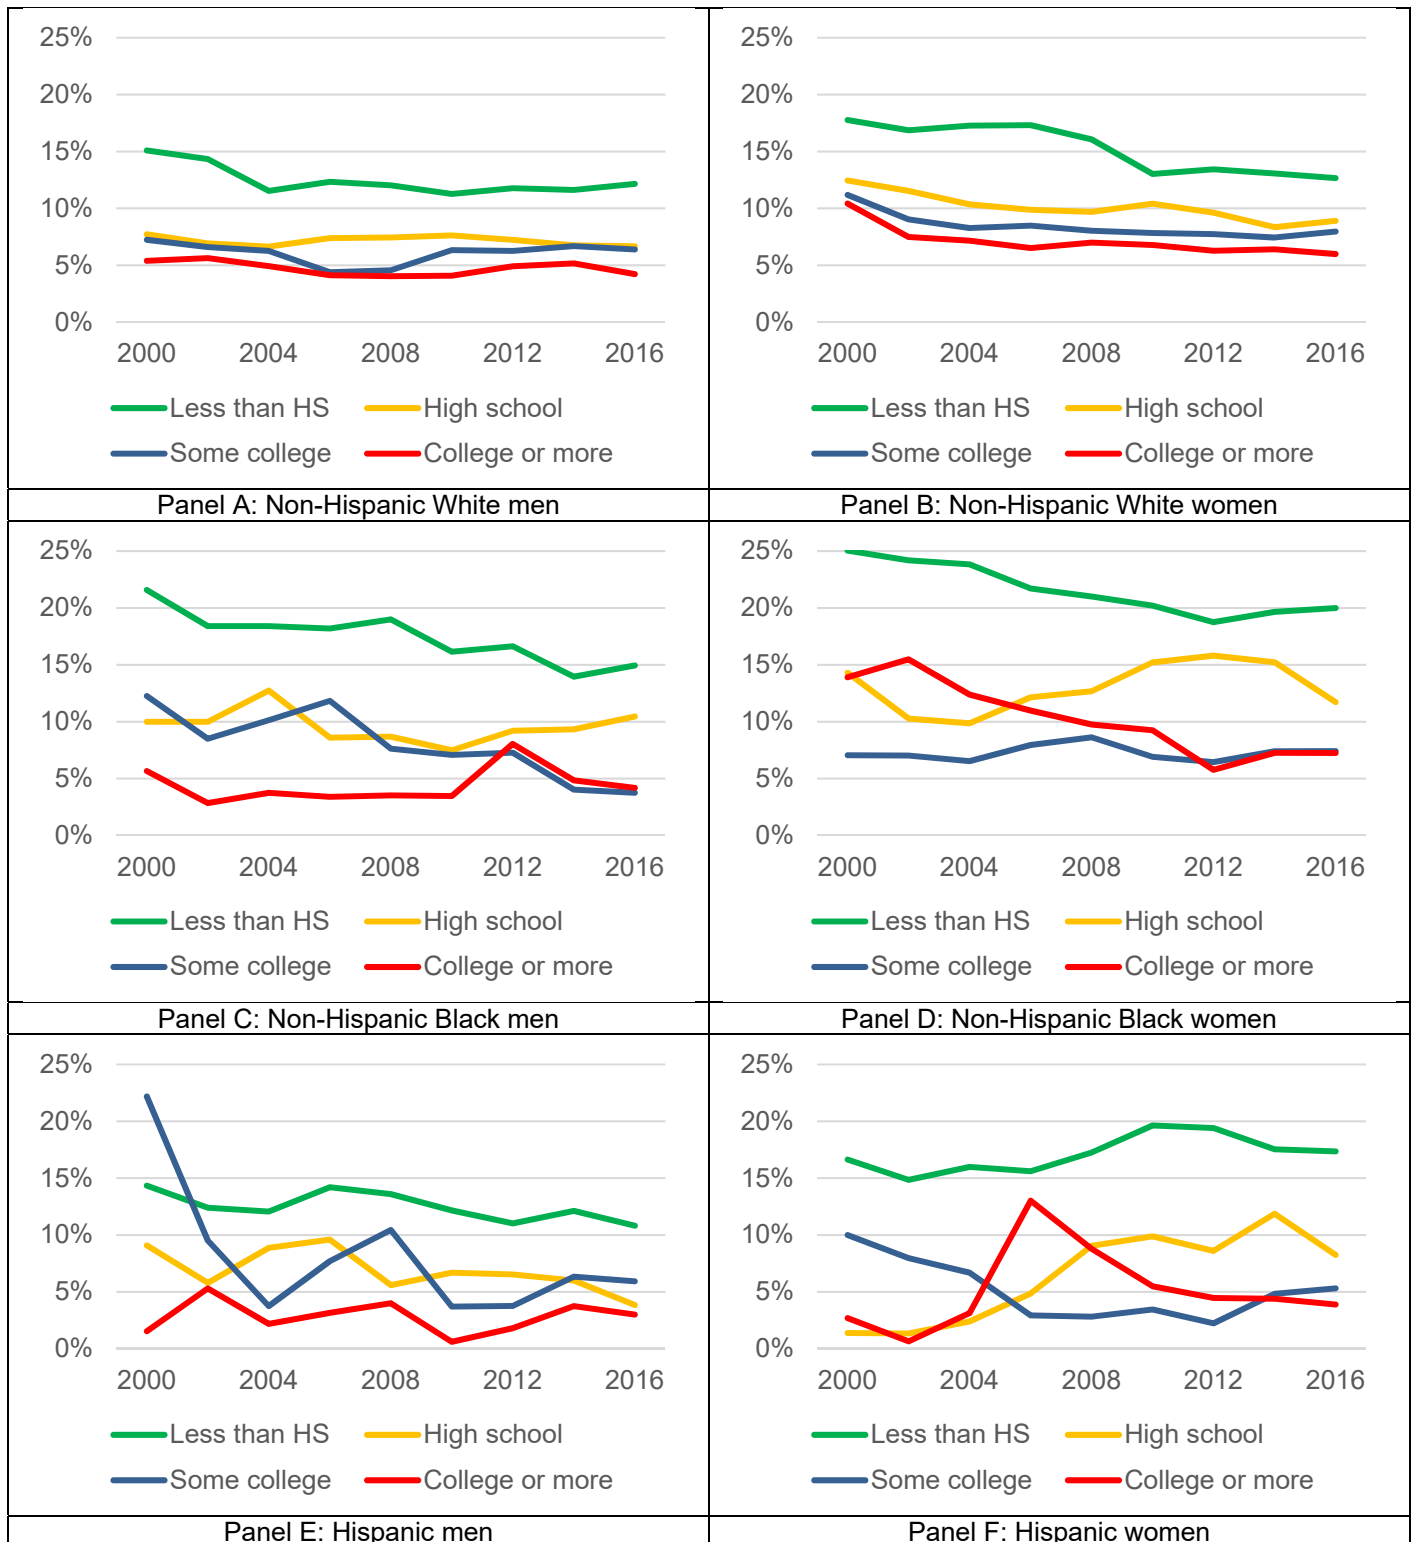

**Fig. S2.** Trends in the age-adjusted prevalence of dementia from 2000 to 2016 by sex, education, and race and ethnicity.

\* Sample: Health and Retirement Study, 2000-2016, Age 65+. Non-Hispanic other race not shown due to small sample size.



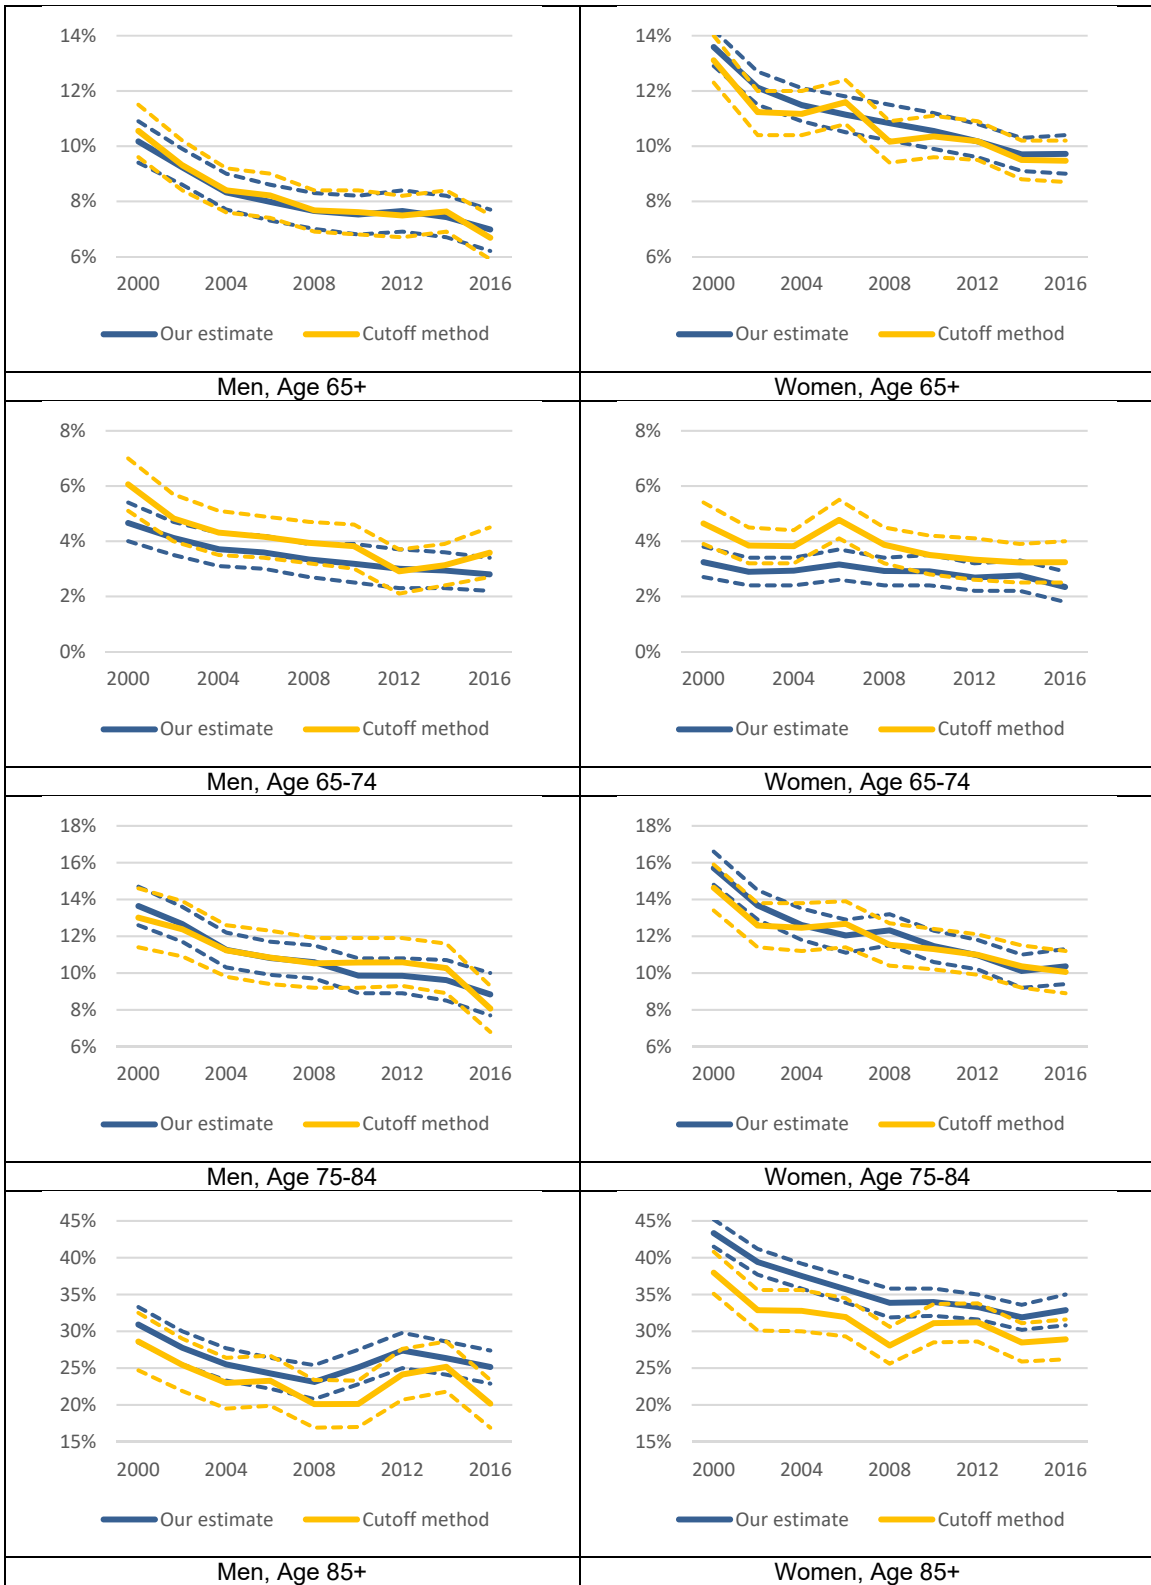

**Fig. S3.** Trends in age-adjusted dementia prevalence by age: comparison of methods.

\* The cutoff method follows the widely used methodology discussed by Crimmins et al. (8). In self-interviews it sums responses to 27 items from the HRS cognitive battery. If the score is below a cutoff level, the respondent is assumed to have dementia. A similar method is used for proxy-interviews.

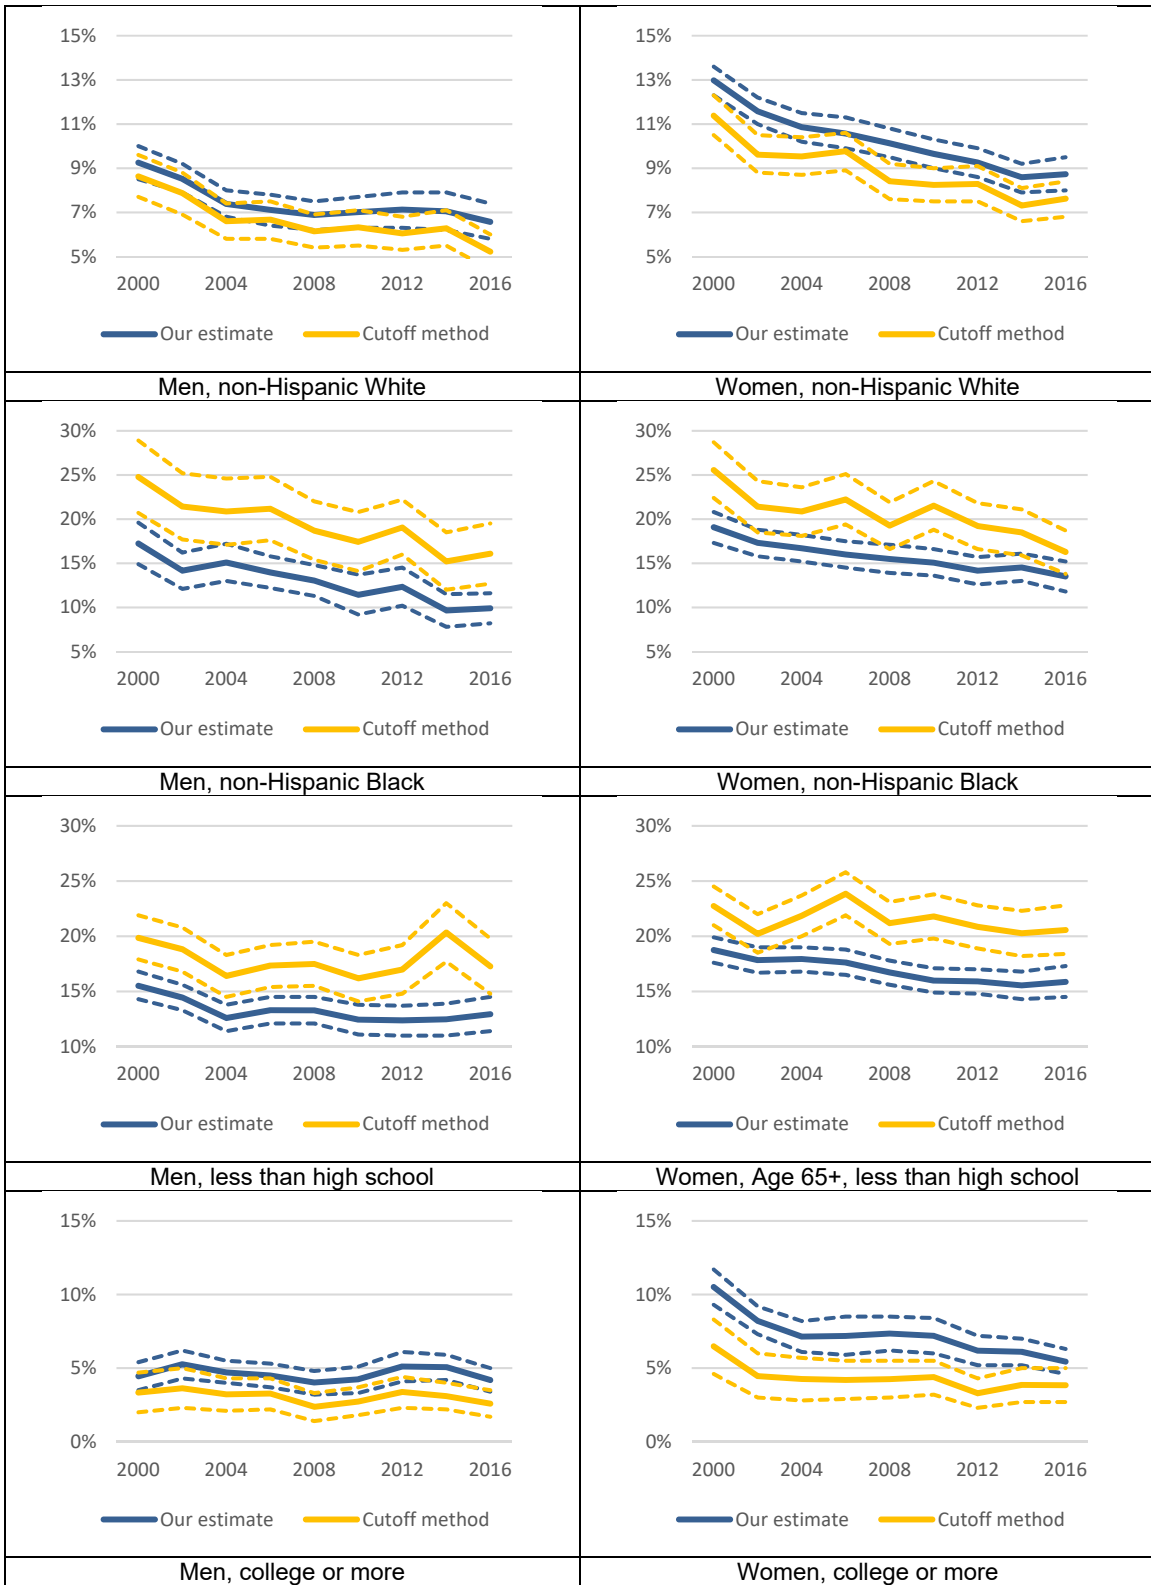

**Fig. S4.** Trends in age-adjusted dementia prevalence by race and ethnicity and education.

\* The cutoff method follows the widely used methodology discussed by Crimmins et al. (8). In self-interviews, it sums responses to 27 items from the HRS cognitive battery. If the score is below a cutoff level, the respondent is assumed to have dementia. A similar method is used for proxy-interviews.

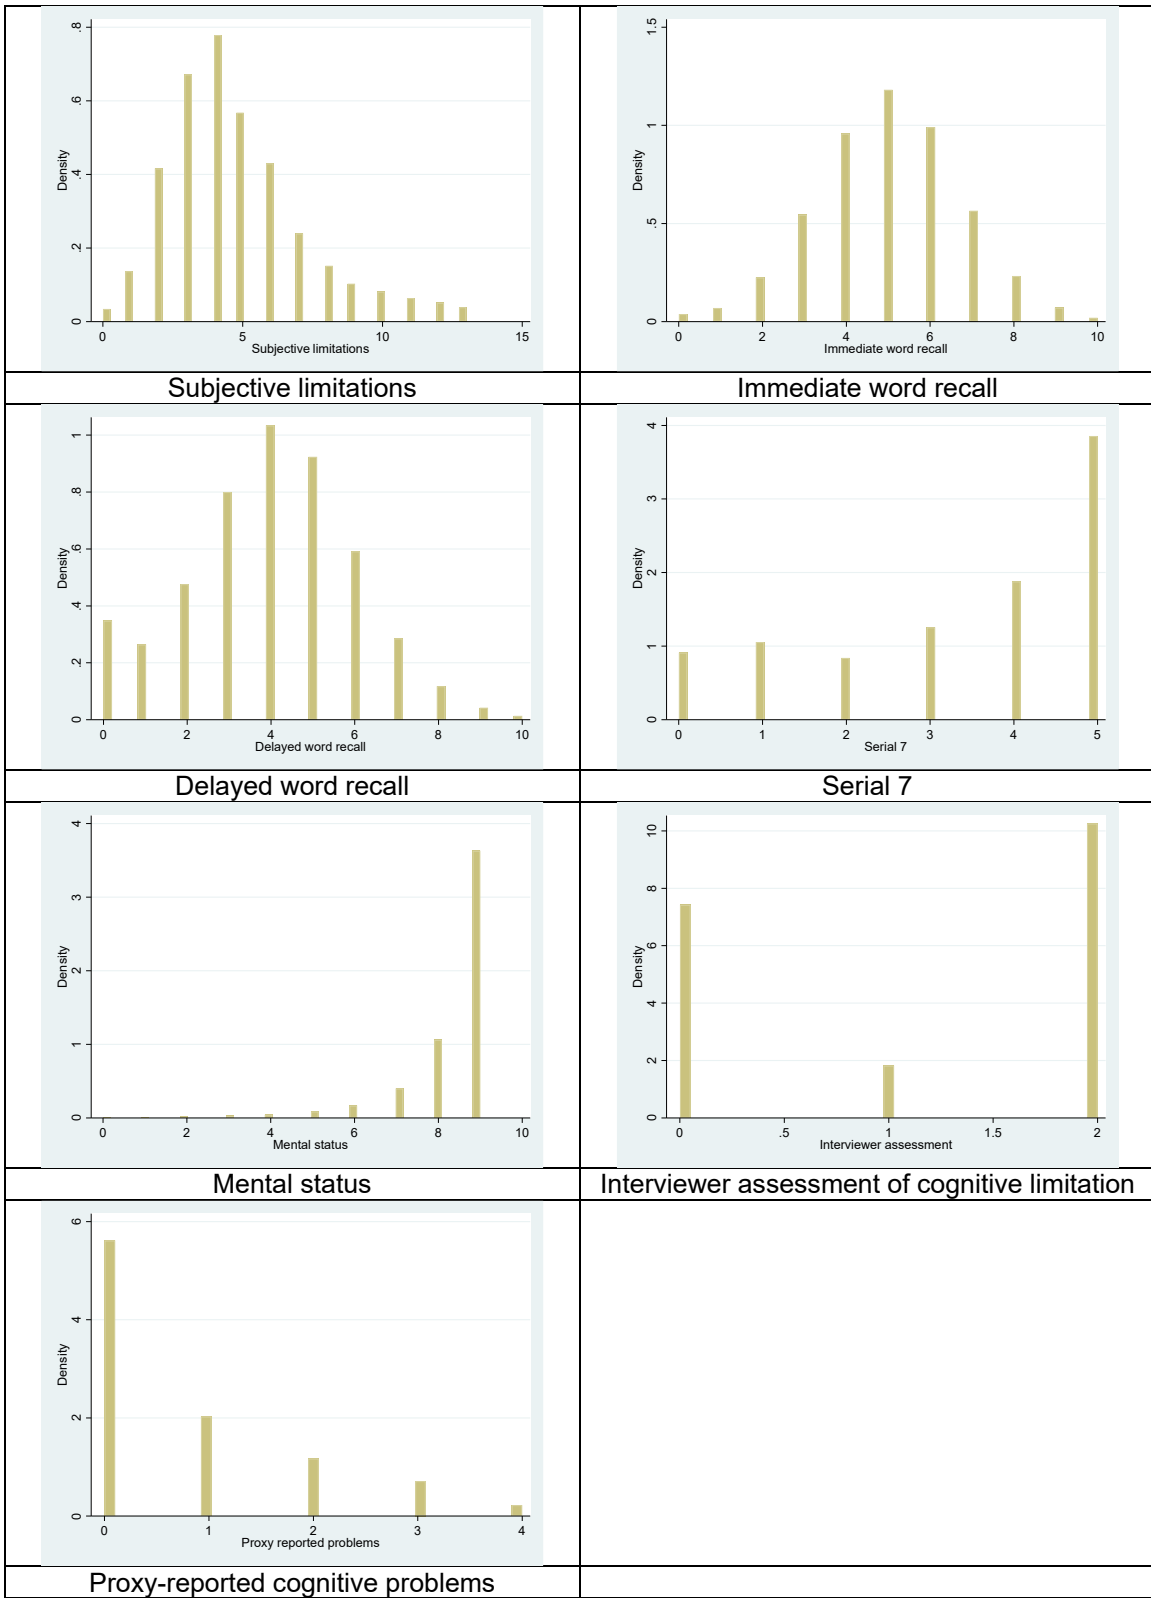

**Fig. S5.** Histograms of seven composite cognition scores in the HRS.

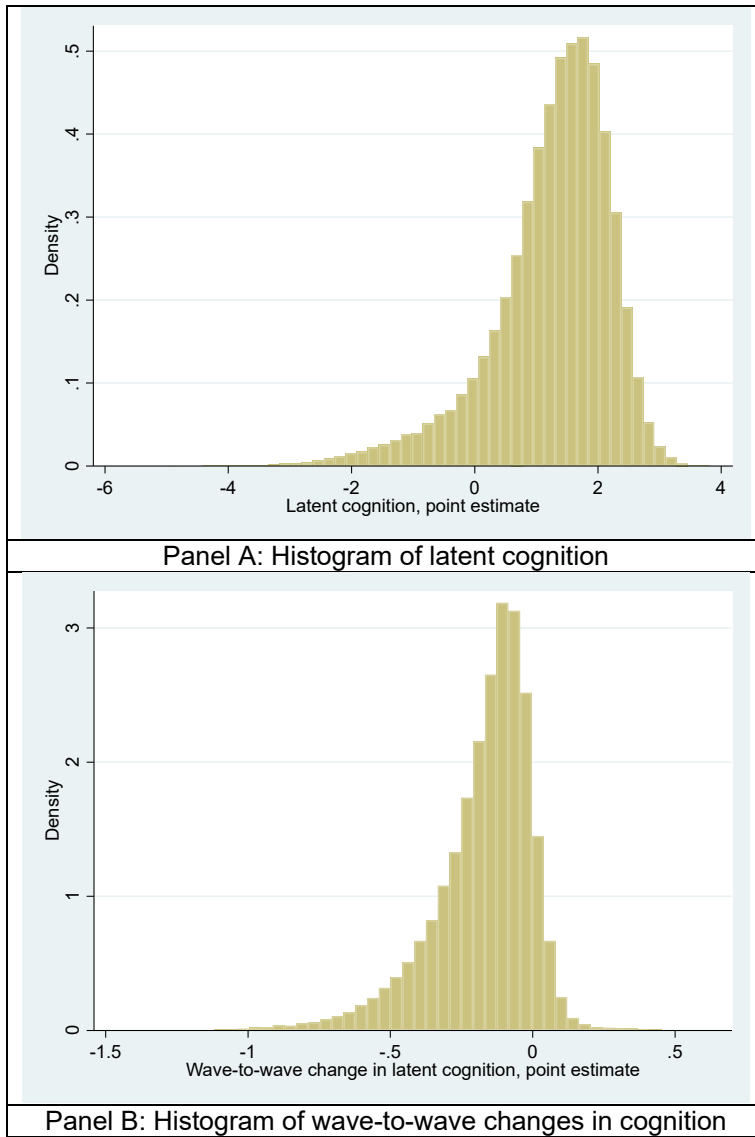

**Fig. S6.** Histograms of cognition and wave-to-wave changes in cognition based on the latent variable model.

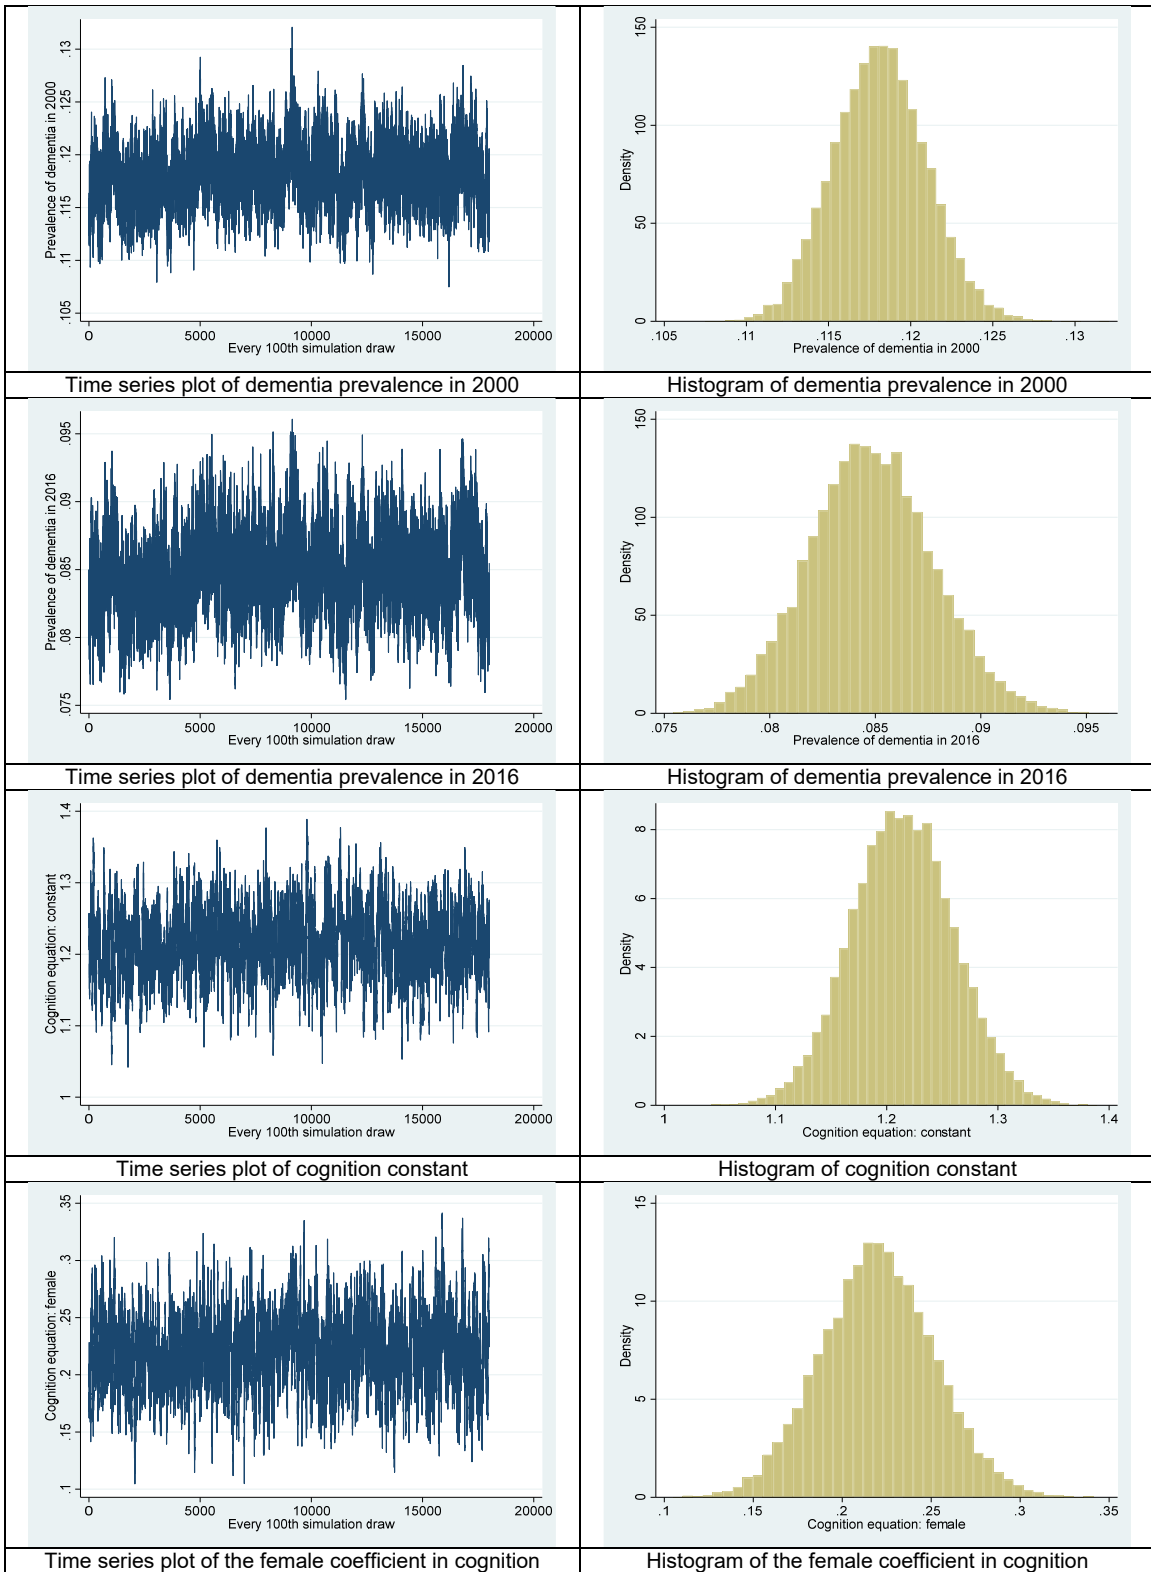

**Fig. S7.** Time series plots and histograms of the MCMC simulation draws of selected coefficients.

**Table S1.** Trends in the age-adjusted prevalence of dementia from 2000 to 2016 by sex, Age 65+.

|                    | Total  |                | Men    |                | Women  |                |
|--------------------|--------|----------------|--------|----------------|--------|----------------|
|                    | Mean   | 95% CI         | Mean   | 95% CI         | Mean   | 95% CI         |
| 2000               | 0.122  | [0.117; 0.127] | 0.102  | [0.094; 0.109] | 0.136  | [0.129; 0.142] |
| 2002               | 0.109  | [0.104; 0.114] | 0.092  | [0.086; 0.099] | 0.121  | [0.115; 0.127] |
| 2004               | 0.102  | [0.097; 0.106] | 0.083  | [0.077; 0.09]  | 0.115  | [0.109; 0.121] |
| 2006               | 0.098  | [0.093; 0.103] | 0.080  | [0.073; 0.086] | 0.111  | [0.105; 0.118] |
| 2008               | 0.095  | [0.09; 0.1]    | 0.077  | [0.07; 0.083]  | 0.108  | [0.102; 0.115] |
| 2010               | 0.093  | [0.087; 0.098] | 0.075  | [0.068; 0.082] | 0.106  | [0.099; 0.112] |
| 2012               | 0.091  | [0.086; 0.096] | 0.077  | [0.069; 0.084] | 0.102  | [0.096; 0.108] |
| 2014               | 0.087  | [0.082; 0.093] | 0.074  | [0.067; 0.082] | 0.097  | [0.091; 0.103] |
| 2016               | 0.085  | [0.079; 0.091] | 0.070  | [0.062; 0.077] | 0.097  | [0.09; 0.104]  |
| $\Delta_{2000-16}$ | -0.037 |                | -0.032 |                | -0.039 |                |

\* Sample: Health and Retirement Study, 2000-2016, Age 65+. The sample includes 21,442 individuals and 97,629 person-year observations.

**Table S2.** Trends in the age-adjusted prevalence of dementia from 2000 to 2016 by sex and age.

| <i>Men</i>         | Age 65-74 |                | Age 75-84 |                | Age 85+ |                |
|--------------------|-----------|----------------|-----------|----------------|---------|----------------|
|                    | Mean      | 95% CI         | Mean      | 95% CI         | Mean    | 95% CI         |
| 2000               | 0.047     | [0.04; 0.054]  | 0.136     | [0.126; 0.147] | 0.309   | [0.285; 0.333] |
| 2002               | 0.041     | [0.035; 0.047] | 0.127     | [0.117; 0.136] | 0.278   | [0.255; 0.3]   |
| 2004               | 0.037     | [0.031; 0.043] | 0.113     | [0.103; 0.122] | 0.255   | [0.233; 0.277] |
| 2006               | 0.036     | [0.03; 0.042]  | 0.108     | [0.099; 0.117] | 0.243   | [0.222; 0.264] |
| 2008               | 0.033     | [0.027; 0.039] | 0.106     | [0.097; 0.115] | 0.231   | [0.208; 0.254] |
| 2010               | 0.032     | [0.025; 0.039] | 0.099     | [0.089; 0.108] | 0.251   | [0.228; 0.275] |
| 2012               | 0.030     | [0.023; 0.037] | 0.099     | [0.089; 0.108] | 0.274   | [0.25; 0.298]  |
| 2014               | 0.029     | [0.023; 0.036] | 0.096     | [0.085; 0.107] | 0.263   | [0.241; 0.286] |
| 2016               | 0.028     | [0.022; 0.034] | 0.088     | [0.077; 0.1]   | 0.252   | [0.229; 0.274] |
| $\Delta_{2000-16}$ | -0.019    |                | -0.048    |                | -0.058  |                |

  

| <i>Women</i>       | Age 65-74 |                | Age 75-84 |                | Age 85+ |                |
|--------------------|-----------|----------------|-----------|----------------|---------|----------------|
|                    | Mean      | 95% CI         | Mean      | 95% CI         | Mean    | 95% CI         |
| 2000               | 0.032     | [0.027; 0.038] | 0.157     | [0.148; 0.166] | 0.433   | [0.415; 0.452] |
| 2002               | 0.029     | [0.024; 0.034] | 0.137     | [0.129; 0.145] | 0.394   | [0.377; 0.412] |
| 2004               | 0.029     | [0.024; 0.034] | 0.126     | [0.118; 0.135] | 0.375   | [0.358; 0.392] |
| 2006               | 0.032     | [0.026; 0.037] | 0.120     | [0.111; 0.129] | 0.357   | [0.339; 0.375] |
| 2008               | 0.029     | [0.024; 0.034] | 0.123     | [0.115; 0.132] | 0.339   | [0.319; 0.358] |
| 2010               | 0.029     | [0.024; 0.035] | 0.115     | [0.106; 0.123] | 0.340   | [0.321; 0.358] |
| 2012               | 0.027     | [0.022; 0.032] | 0.110     | [0.102; 0.118] | 0.333   | [0.316; 0.35]  |
| 2014               | 0.028     | [0.022; 0.033] | 0.101     | [0.092; 0.11]  | 0.319   | [0.302; 0.336] |
| 2016               | 0.023     | [0.018; 0.029] | 0.104     | [0.094; 0.113] | 0.329   | [0.308; 0.35]  |
| $\Delta_{2000-16}$ | -0.009    |                | -0.053    |                | -0.105  |                |

\* Sample: Health and Retirement Study, 2000-2016, Age 65+. The sample includes 21,442 individuals and 97,629 person-year observations.

**Table S3.** Trends in the age-adjusted prevalence of dementia from 2000 to 2016 by sex and education.

|                    | Less than high school |                | High school |                | Some college |                | College or more |                |
|--------------------|-----------------------|----------------|-------------|----------------|--------------|----------------|-----------------|----------------|
|                    | Mean                  | 95% CI         | Mean        | 95% CI         | Mean         | 95% CI         | Mean            | 95% CI         |
| <i>Men</i>         |                       |                |             |                |              |                |                 |                |
| 2000               | 0.162                 | [0.149; 0.174] | 0.079       | [0.068; 0.09]  | 0.077        | [0.063; 0.09]  | 0.054           | [0.044; 0.065] |
| 2002               | 0.150                 | [0.138; 0.162] | 0.072       | [0.062; 0.082] | 0.068        | [0.057; 0.078] | 0.056           | [0.046; 0.066] |
| 2004               | 0.130                 | [0.118; 0.142] | 0.072       | [0.062; 0.083] | 0.067        | [0.058; 0.076] | 0.048           | [0.04; 0.056]  |
| 2006               | 0.133                 | [0.121; 0.145] | 0.075       | [0.065; 0.085] | 0.054        | [0.043; 0.064] | 0.043           | [0.035; 0.05]  |
| 2008               | 0.132                 | [0.12; 0.144]  | 0.074       | [0.064; 0.083] | 0.053        | [0.041; 0.065] | 0.039           | [0.031; 0.047] |
| 2010               | 0.122                 | [0.108; 0.136] | 0.077       | [0.066; 0.089] | 0.064        | [0.052; 0.075] | 0.040           | [0.031; 0.048] |
| 2012               | 0.123                 | [0.109; 0.136] | 0.076       | [0.063; 0.088] | 0.063        | [0.05; 0.076]  | 0.049           | [0.039; 0.058] |
| 2014               | 0.119                 | [0.105; 0.133] | 0.071       | [0.056; 0.085] | 0.066        | [0.052; 0.079] | 0.050           | [0.042; 0.059] |
| 2016               | 0.121                 | [0.106; 0.136] | 0.070       | [0.055; 0.086] | 0.062        | [0.049; 0.075] | 0.042           | [0.034; 0.05]  |
| $\Delta_{2000-16}$ | -0.041                |                | -0.009      |                | -0.015       |                | -0.013          |                |
| <i>Women</i>       |                       |                |             |                |              |                |                 |                |
| 2000               | 0.187                 | [0.176; 0.198] | 0.124       | [0.114; 0.133] | 0.106        | [0.096; 0.117] | 0.105           | [0.094; 0.116] |
| 2002               | 0.177                 | [0.166; 0.188] | 0.113       | [0.104; 0.121] | 0.086        | [0.077; 0.094] | 0.079           | [0.07; 0.088]  |
| 2004               | 0.182                 | [0.171; 0.192] | 0.101       | [0.092; 0.109] | 0.079        | [0.07; 0.088]  | 0.073           | [0.064; 0.083] |
| 2006               | 0.177                 | [0.166; 0.188] | 0.098       | [0.089; 0.107] | 0.082        | [0.07; 0.093]  | 0.067           | [0.055; 0.079] |
| 2008               | 0.171                 | [0.159; 0.182] | 0.098       | [0.087; 0.108] | 0.079        | [0.069; 0.088] | 0.070           | [0.059; 0.081] |
| 2010               | 0.156                 | [0.146; 0.167] | 0.107       | [0.097; 0.117] | 0.076        | [0.067; 0.085] | 0.069           | [0.058; 0.079] |
| 2012               | 0.159                 | [0.148; 0.17]  | 0.100       | [0.091; 0.11]  | 0.074        | [0.064; 0.084] | 0.062           | [0.052; 0.071] |
| 2014               | 0.156                 | [0.144; 0.168] | 0.092       | [0.083; 0.1]   | 0.074        | [0.062; 0.085] | 0.063           | [0.053; 0.073] |
| 2016               | 0.155                 | [0.141; 0.169] | 0.093       | [0.082; 0.103] | 0.079        | [0.068; 0.09]  | 0.059           | [0.05; 0.068]  |
| $\Delta_{2000-16}$ | -0.032                |                | -0.031      |                | -0.027       |                | -0.046          |                |

\* Sample: Health and Retirement Study, 2000-2016, Age 65+. The sample includes 21,442 individuals and 97,629 person-year observations.



**Table S4.** Trends in the age-adjusted prevalence of dementia from 2000 to 2016 by sex and Social Security income quartile.

| <i>Men</i>         | Lowest SS income |                | 2nd SS income |                | 3rd SS income |                | Highest SS income |                |
|--------------------|------------------|----------------|---------------|----------------|---------------|----------------|-------------------|----------------|
|                    | Mean             | 95% CI         | Mean          | 95% CI         | Mean          | 95% CI         | Mean              | 95% CI         |
| 2000               | 0.159            | [0.141; 0.176] | 0.134         | [0.121; 0.147] | 0.070         | [0.059; 0.08]  | 0.063             | [0.053; 0.074] |
| 2002               | 0.148            | [0.133; 0.163] | 0.114         | [0.101; 0.126] | 0.069         | [0.06; 0.078]  | 0.060             | [0.051; 0.07]  |
| 2004               | 0.133            | [0.118; 0.147] | 0.106         | [0.093; 0.119] | 0.057         | [0.049; 0.064] | 0.059             | [0.051; 0.067] |
| 2006               | 0.128            | [0.114; 0.142] | 0.106         | [0.093; 0.119] | 0.056         | [0.046; 0.065] | 0.054             | [0.045; 0.063] |
| 2008               | 0.114            | [0.099; 0.128] | 0.110         | [0.098; 0.123] | 0.053         | [0.045; 0.062] | 0.055             | [0.046; 0.064] |
| 2010               | 0.099            | [0.084; 0.115] | 0.110         | [0.095; 0.124] | 0.060         | [0.051; 0.07]  | 0.056             | [0.047; 0.066] |
| 2012               | 0.101            | [0.086; 0.115] | 0.109         | [0.093; 0.125] | 0.068         | [0.057; 0.078] | 0.055             | [0.046; 0.065] |
| 2014               | 0.107            | [0.09; 0.124]  | 0.100         | [0.084; 0.115] | 0.059         | [0.048; 0.07]  | 0.059             | [0.049; 0.068] |
| 2016               | 0.090            | [0.075; 0.104] | 0.098         | [0.081; 0.116] | 0.065         | [0.053; 0.077] | 0.050             | [0.041; 0.06]  |
| $\Delta_{2000-16}$ | -0.069           |                | -0.036        |                | -0.005        |                | -0.013            |                |

  

| <i>Women</i>       | Lowest SS income |                | 2nd SS income |                | 3rd SS income |                | 4th SS income |                |
|--------------------|------------------|----------------|---------------|----------------|---------------|----------------|---------------|----------------|
|                    | Mean             | 95% CI         | Mean          | 95% CI         | Mean          | 95% CI         | Mean          | 95% CI         |
| 2000               | 0.179            | [0.166; 0.192] | 0.157         | [0.145; 0.168] | 0.102         | [0.092; 0.111] | 0.101         | [0.091; 0.11]  |
| 2002               | 0.171            | [0.159; 0.183] | 0.141         | [0.131; 0.152] | 0.083         | [0.074; 0.091] | 0.084         | [0.077; 0.092] |
| 2004               | 0.169            | [0.158; 0.181] | 0.138         | [0.128; 0.148] | 0.080         | [0.072; 0.088] | 0.068         | [0.059; 0.077] |
| 2006               | 0.163            | [0.15; 0.175]  | 0.131         | [0.12; 0.142]  | 0.080         | [0.07; 0.09]   | 0.072         | [0.062; 0.083] |
| 2008               | 0.155            | [0.143; 0.168] | 0.128         | [0.117; 0.138] | 0.083         | [0.073; 0.093] | 0.070         | [0.061; 0.08]  |
| 2010               | 0.150            | [0.138; 0.162] | 0.127         | [0.115; 0.139] | 0.081         | [0.073; 0.09]  | 0.070         | [0.061; 0.079] |
| 2012               | 0.147            | [0.134; 0.159] | 0.127         | [0.116; 0.138] | 0.078         | [0.069; 0.087] | 0.063         | [0.055; 0.072] |
| 2014               | 0.140            | [0.127; 0.152] | 0.126         | [0.114; 0.139] | 0.065         | [0.056; 0.073] | 0.069         | [0.06; 0.078]  |
| 2016               | 0.144            | [0.131; 0.158] | 0.125         | [0.111; 0.138] | 0.069         | [0.06; 0.079]  | 0.064         | [0.055; 0.073] |
| $\Delta_{2000-16}$ | -0.035           |                | -0.032        |                | -0.032        |                | -0.037        |                |

\* Sample: Health and Retirement Study, 2000-2016, Age 65+. The sample includes 21,442 individuals and 97,629 person-year observations.

**Table S5.** Trends in the age-adjusted prevalence of dementia from 2000 to 2016 by sex, race and ethnicity.

|                    | Non-Hispanic White |                | Non-Hispanic Black |                | Non-Hispanic other |                | Hispanic |                |
|--------------------|--------------------|----------------|--------------------|----------------|--------------------|----------------|----------|----------------|
|                    | Mean               | 95% CI         | Mean               | 95% CI         | Mean               | 95% CI         | Mean     | 95% CI         |
| <i>Men</i>         |                    |                |                    |                |                    |                |          |                |
| 2000               | 0.093              | [0.085; 0.1]   | 0.172              | [0.149; 0.196] | 0.162              | [0.122; 0.203] | 0.121    | [0.098; 0.143] |
| 2002               | 0.085              | [0.079; 0.092] | 0.142              | [0.121; 0.162] | 0.156              | [0.122; 0.19]  | 0.105    | [0.082; 0.127] |
| 2004               | 0.074              | [0.068; 0.08]  | 0.151              | [0.13; 0.172]  | 0.149              | [0.115; 0.182] | 0.107    | [0.084; 0.13]  |
| 2006               | 0.071              | [0.064; 0.078] | 0.140              | [0.122; 0.158] | 0.100              | [0.075; 0.126] | 0.123    | [0.105; 0.142] |
| 2008               | 0.069              | [0.062; 0.075] | 0.130              | [0.113; 0.148] | 0.089              | [0.053; 0.124] | 0.111    | [0.094; 0.128] |
| 2010               | 0.070              | [0.063; 0.077] | 0.114              | [0.092; 0.137] | 0.083              | [0.046; 0.119] | 0.094    | [0.077; 0.112] |
| 2012               | 0.071              | [0.063; 0.079] | 0.123              | [0.102; 0.145] | 0.061              | [0.031; 0.092] | 0.087    | [0.07; 0.103]  |
| 2014               | 0.071              | [0.062; 0.079] | 0.097              | [0.078; 0.115] | 0.058              | [0.02; 0.095]  | 0.096    | [0.077; 0.116] |
| 2016               | 0.066              | [0.058; 0.074] | 0.099              | [0.082; 0.116] | 0.057              | [0.025; 0.089] | 0.084    | [0.066; 0.103] |
| $\Delta_{2000-16}$ | -0.027             |                | -0.073             |                | -0.105             |                | -0.036   |                |
|                    | -0.290             |                | -0.426             |                | -0.649             |                | -0.302   |                |
| <i>Women</i>       |                    |                |                    |                |                    |                |          |                |
| 2000               | 0.130              | [0.123; 0.136] | 0.191              | [0.173; 0.208] | 0.187              | [0.144; 0.229] | 0.138    | [0.118; 0.158] |
| 2002               | 0.116              | [0.11; 0.122]  | 0.173              | [0.158; 0.188] | 0.182              | [0.147; 0.217] | 0.116    | [0.099; 0.132] |
| 2004               | 0.109              | [0.102; 0.115] | 0.167              | [0.152; 0.182] | 0.143              | [0.116; 0.169] | 0.123    | [0.108; 0.137] |
| 2006               | 0.106              | [0.099; 0.113] | 0.160              | [0.145; 0.175] | 0.112              | [0.086; 0.138] | 0.120    | [0.101; 0.139] |
| 2008               | 0.101              | [0.095; 0.108] | 0.155              | [0.139; 0.171] | 0.093              | [0.064; 0.123] | 0.138    | [0.12; 0.156]  |
| 2010               | 0.097              | [0.09; 0.103]  | 0.151              | [0.136; 0.166] | 0.084              | [0.05; 0.117]  | 0.156    | [0.136; 0.175] |
| 2012               | 0.093              | [0.086; 0.099] | 0.142              | [0.126; 0.157] | 0.091              | [0.058; 0.124] | 0.150    | [0.131; 0.169] |
| 2014               | 0.086              | [0.079; 0.092] | 0.145              | [0.13; 0.161]  | 0.100              | [0.064; 0.135] | 0.144    | [0.122; 0.166] |
| 2016               | 0.087              | [0.08; 0.095]  | 0.135              | [0.118; 0.152] | 0.107              | [0.062; 0.151] | 0.136    | [0.115; 0.157] |
| $\Delta_{2000-16}$ | -0.043             |                | -0.056             |                | -0.080             |                | -0.002   |                |

\* Sample: Health and Retirement Study, 2000-2016, Age 65+. The sample includes 21,442 individuals and 97,629 person-year observations.

**Table S6.** Trends in the age-adjusted prevalence of dementia from 2000 to 2016 by sex and birthplace.

| <i>Men</i>         | Born in the U.S. |                | Foreign born |                |
|--------------------|------------------|----------------|--------------|----------------|
|                    | Mean             | 95% CI         | Mean         | 95% CI         |
| 2000               | 0.100            | [0.092; 0.107] | 0.121        | [0.1; 0.142]   |
| 2002               | 0.089            | [0.083; 0.096] | 0.123        | [0.102; 0.143] |
| 2004               | 0.081            | [0.074; 0.087] | 0.113        | [0.093; 0.133] |
| 2006               | 0.076            | [0.069; 0.082] | 0.121        | [0.1; 0.142]   |
| 2008               | 0.073            | [0.066; 0.079] | 0.111        | [0.092; 0.13]  |
| 2010               | 0.071            | [0.064; 0.078] | 0.115        | [0.093; 0.138] |
| 2012               | 0.074            | [0.066; 0.082] | 0.099        | [0.081; 0.117] |
| 2014               | 0.072            | [0.064; 0.08]  | 0.096        | [0.079; 0.113] |
| 2016               | 0.068            | [0.06; 0.075]  | 0.085        | [0.066; 0.104] |
| $\Delta_{2000-16}$ | -0.032           |                | -0.036       |                |

  

| <i>Women</i>       | Born in the U.S. |                | Foreign born |                |
|--------------------|------------------|----------------|--------------|----------------|
|                    | Mean             | 95% CI         | Mean         | 95% CI         |
| 2000               | 0.135            | [0.128; 0.141] | 0.148        | [0.127; 0.17]  |
| 2002               | 0.120            | [0.114; 0.125] | 0.138        | [0.118; 0.158] |
| 2004               | 0.112            | [0.106; 0.118] | 0.145        | [0.126; 0.164] |
| 2006               | 0.108            | [0.101; 0.115] | 0.145        | [0.127; 0.164] |
| 2008               | 0.104            | [0.098; 0.11]  | 0.152        | [0.135; 0.168] |
| 2010               | 0.100            | [0.094; 0.106] | 0.156        | [0.138; 0.173] |
| 2012               | 0.098            | [0.092; 0.104] | 0.136        | [0.117; 0.154] |
| 2014               | 0.094            | [0.087; 0.1]   | 0.128        | [0.107; 0.149] |
| 2016               | 0.093            | [0.086; 0.1]   | 0.130        | [0.107; 0.152] |
| $\Delta_{2000-16}$ | -0.042           |                | -0.019       |                |

\* Sample: Health and Retirement Study, 2000-2016, Age 65+. The sample includes 21,442 individuals and 97,629 person-year observations.

**Table S7.** 16-year change in the prevalence of dementia by sex, adjusting for compositional changes in factors added one-by-one.

|                                            | Dementia prevalence |                  |                      |
|--------------------------------------------|---------------------|------------------|----------------------|
|                                            | 2000                | 2016             | $\Delta_{2000-2016}$ |
| Men, unadjusted                            | 0.093<br>[0.003]    | 0.069<br>[0.003] | -0.024***<br>[0.003] |
| Men, age-adjusted                          | 0.093<br>[0.003]    | 0.068<br>[0.003] | -0.025***<br>[0.003] |
| Men, age- & education-adjusted             | 0.087<br>[0.003]    | 0.073<br>[0.004] | -0.014***<br>[0.003] |
| Men, age- & income-adjusted                | 0.09<br>[0.003]     | 0.071<br>[0.004] | -0.019***<br>[0.003] |
| Men, age- & race- and ethnicity-adjusted   | 0.094<br>[0.003]    | 0.068<br>[0.003] | -0.026***<br>[0.003] |
| Men, age- & birth country-adjusted         | 0.094<br>[0.003]    | 0.068<br>[0.003] | -0.026***<br>[0.003] |
| Men, age- & marital status-adjusted        | 0.094<br>[0.003]    | 0.068<br>[0.003] | -0.026***<br>[0.003] |
| Men, age- & hypertension-adjusted          | 0.094<br>[0.003]    | 0.068<br>[0.003] | -0.026***<br>[0.003] |
| Men, age- & diabetes-adjusted              | 0.096<br>[0.003]    | 0.067<br>[0.003] | -0.029***<br>[0.003] |
| Men, age- & heart problem-adjusted         | 0.094<br>[0.003]    | 0.068<br>[0.003] | -0.025***<br>[0.003] |
| Men, age- & stroke-adjusted                | 0.093<br>[0.003]    | 0.068<br>[0.003] | -0.025***<br>[0.003] |
| Women, unadjusted                          | 0.127<br>[0.003]    | 0.094<br>[0.003] | -0.032***<br>[0.003] |
| Women, age-adjusted                        | 0.127<br>[0.003]    | 0.093<br>[0.003] | -0.034***<br>[0.003] |
| Women, age- & education-adjusted           | 0.123<br>[0.003]    | 0.097<br>[0.003] | -0.026***<br>[0.003] |
| Women, age- & income-adjusted              | 0.124<br>[0.003]    | 0.096<br>[0.003] | -0.028***<br>[0.003] |
| Women, age- & race- and ethnicity-adjusted | 0.129<br>[0.003]    | 0.092<br>[0.003] | -0.037***<br>[0.003] |
| Women, age- & birth country-adjusted       | 0.127<br>[0.003]    | 0.093<br>[0.003] | -0.034***<br>[0.003] |
| Women, age- & marital status-adjusted      | 0.127<br>[0.003]    | 0.094<br>[0.003] | -0.033***<br>[0.003] |
| Women, age- & hypertension-adjusted        | 0.127<br>[0.003]    | 0.093<br>[0.003] | -0.033***<br>[0.003] |
| Women, age- & diabetes-adjusted            | 0.13<br>[0.003]     | 0.091<br>[0.003] | -0.039***<br>[0.003] |
| Women, age- & heart problem-adjusted       | 0.127<br>[0.003]    | 0.093<br>[0.003] | -0.034***<br>[0.003] |
| Women, age- & stroke-adjusted              | 0.125<br>[0.003]    | 0.095<br>[0.003] | -0.030***<br>[0.003] |

\* Sample: Health and Retirement Study, 2000-2016, Age 65+. The sample includes 21,442 individuals and 97,629 person-year observations. The 2000 and 2016 values are estimated after fitting a linear time trend on the data. The unadjusted models do not adjust the samples to compositional changes. The adjusted models adjust the distribution of different factors in the 2000 and 2016 samples to the overall sample mean between 2000 and 2016.

**Table S8.** 16-year change in the prevalence of dementia among men, by age, race and ethnicity, birthplace, and Social Security income quartile.

|                                  | Age-adjusted prevalence |                  |                      | Age-, education-, demographics-, & health-adjusted prevalence |                  |                      |
|----------------------------------|-------------------------|------------------|----------------------|---------------------------------------------------------------|------------------|----------------------|
|                                  | 2000                    | 2016             | $\Delta_{2000-2016}$ | 2000                                                          | 2016             | $\Delta_{2000-2016}$ |
| Age 65-69                        | 0.037<br>[0.003]        | 0.02<br>[0.003]  | -0.017***<br>[0.004] | 0.034<br>[0.003]                                              | 0.022<br>[0.003] | -0.012***<br>[0.004] |
| Age 70-74                        | 0.051<br>[0.003]        | 0.035<br>[0.003] | -0.016***<br>[0.004] | 0.046<br>[0.003]                                              | 0.039<br>[0.004] | -0.006*<br>[0.004]   |
| Age 75-79                        | 0.1<br>[0.004]          | 0.065<br>[0.004] | -0.035***<br>[0.004] | 0.094<br>[0.004]                                              | 0.071<br>[0.005] | -0.023***<br>[0.004] |
| Age 80-84                        | 0.17<br>[0.005]         | 0.119<br>[0.006] | -0.051***<br>[0.006] | 0.164<br>[0.005]                                              | 0.124<br>[0.006] | -0.039***<br>[0.006] |
| Age 85-89                        | 0.247<br>[0.007]        | 0.202<br>[0.009] | -0.045***<br>[0.009] | 0.24<br>[0.008]                                               | 0.208<br>[0.009] | -0.031***<br>[0.009] |
| Age 90+                          | 0.331<br>[0.016]        | 0.358<br>[0.015] | 0.027<br>[0.021]     | 0.305<br>[0.017]                                              | 0.369<br>[0.016] | 0.064***<br>[0.022]  |
| Non-Hispanic White               | 0.084<br>[0.003]        | 0.065<br>[0.004] | -0.019***<br>[0.003] | 0.077<br>[0.003]                                              | 0.069<br>[0.004] | -0.008**<br>[0.003]  |
| Non-Hispanic Black               | 0.163<br>[0.009]        | 0.097<br>[0.008] | -0.067***<br>[0.010] | 0.154<br>[0.009]                                              | 0.103<br>[0.008] | -0.051***<br>[0.010] |
| Non-Hispanic other               | 0.162<br>[0.014]        | 0.039<br>[0.014] | -0.123***<br>[0.019] | 0.155<br>[0.014]                                              | 0.043<br>[0.014] | -0.111***<br>[0.019] |
| Hispanic                         | 0.121<br>[0.009]        | 0.086<br>[0.008] | -0.036***<br>[0.011] | 0.116<br>[0.009]                                              | 0.089<br>[0.008] | -0.027**<br>[0.011]  |
| Born in the U.S.                 | 0.09<br>[0.003]         | 0.066<br>[0.004] | -0.025***<br>[0.003] | 0.084<br>[0.003]                                              | 0.071<br>[0.004] | -0.013***<br>[0.003] |
| Foreign born                     | 0.128<br>[0.009]        | 0.092<br>[0.008] | -0.036***<br>[0.010] | 0.126<br>[0.009]                                              | 0.093<br>[0.008] | -0.033***<br>[0.010] |
| Lowest Soc. Sec. income quartile | 0.152<br>[0.007]        | 0.087<br>[0.006] | -0.065***<br>[0.008] | 0.145<br>[0.007]                                              | 0.092<br>[0.006] | -0.053***<br>[0.008] |
| 2nd quartile                     | 0.12<br>[0.006]         | 0.098<br>[0.007] | -0.021***<br>[0.007] | 0.12<br>[0.006]                                               | 0.098<br>[0.007] | -0.022***<br>[0.007] |
| 3rd quartile                     | 0.063<br>[0.004]        | 0.061<br>[0.005] | -0.002<br>[0.005]    | 0.062<br>[0.004]                                              | 0.062<br>[0.005] | 0.001<br>[0.005]     |
| Highest Soc Sec. income quartile | 0.06<br>[0.004]         | 0.054<br>[0.004] | -0.006<br>[0.004]    | 0.059<br>[0.004]                                              | 0.055<br>[0.004] | -0.004<br>[0.004]    |

\* Sample: Health and Retirement Study, 2000-2016, Age 65+. The sample includes 21,442 individuals and 97,629 person-year observations. The 2000 and 2016 values are estimated after fitting a linear time trend on the data. The unadjusted models do not adjust the samples to compositional changes. The age-, education-, demographics-, & health-adjusted models adjust the distributions of age, education, income, race and ethnicity, foreign-born status, marital status, hypertension, diabetes, stroke, and heart problems in the 2000 and 2016 samples to the overall sample mean between 2000 and 2016. The age-adjusted versions only adjust the distribution of age.

**Table S9.** 16-year change in the prevalence of dementia among women, by age, race and ethnicity, birthplace, and Social Security income quartile.

|                                    | Age-adjusted prevalence |                  |                      | Age-, education-, demographics-, & health-adjusted prevalence |                  |                      |
|------------------------------------|-------------------------|------------------|----------------------|---------------------------------------------------------------|------------------|----------------------|
|                                    | 2000                    | 2016             | $\Delta_{2000-2016}$ | 2000                                                          | 2016             | $\Delta_{2000-2016}$ |
| Age 65-69                          | 0.026<br>[0.002]        | 0.02<br>[0.003]  | -0.006**<br>[0.003]  | 0.026<br>[0.002]                                              | 0.019<br>[0.003] | -0.007**<br>[0.003]  |
| Age 70-74                          | 0.04<br>[0.003]         | 0.033<br>[0.003] | -0.007**<br>[0.003]  | 0.04<br>[0.003]                                               | 0.035<br>[0.003] | -0.005<br>[0.003]    |
| Age 75-79                          | 0.101<br>[0.003]        | 0.068<br>[0.004] | -0.033***<br>[0.003] | 0.095<br>[0.003]                                              | 0.07<br>[0.004]  | -0.026***<br>[0.004] |
| Age 80-84                          | 0.2<br>[0.005]          | 0.134<br>[0.005] | -0.066***<br>[0.005] | 0.19<br>[0.005]                                               | 0.137<br>[0.005] | -0.052***<br>[0.005] |
| Age 85-89                          | 0.33<br>[0.007]         | 0.236<br>[0.007] | -0.094***<br>[0.007] | 0.319<br>[0.007]                                              | 0.248<br>[0.007] | -0.071***<br>[0.007] |
| Age 90+                            | 0.526<br>[0.011]        | 0.433<br>[0.012] | -0.093***<br>[0.013] | 0.498<br>[0.012]                                              | 0.454<br>[0.012] | -0.045***<br>[0.013] |
| Non-Hispanic White                 | 0.122<br>[0.003]        | 0.083<br>[0.003] | -0.039***<br>[0.003] | 0.115<br>[0.003]                                              | 0.089<br>[0.003] | -0.026***<br>[0.003] |
| Non-Hispanic Black                 | 0.182<br>[0.007]        | 0.134<br>[0.007] | -0.048***<br>[0.008] | 0.177<br>[0.007]                                              | 0.136<br>[0.007] | -0.041***<br>[0.008] |
| Non-Hispanic other                 | 0.163<br>[0.015]        | 0.081<br>[0.017] | -0.081***<br>[0.020] | 0.162<br>[0.015]                                              | 0.081<br>[0.017] | -0.081***<br>[0.020] |
| Hispanic                           | 0.125<br>[0.007]        | 0.146<br>[0.009] | 0.021**<br>[0.010]   | 0.119<br>[0.008]                                              | 0.148<br>[0.009] | 0.029***<br>[0.010]  |
| Born in the U.S.                   | 0.125<br>[0.003]        | 0.089<br>[0.003] | -0.036***<br>[0.003] | 0.119<br>[0.003]                                              | 0.093<br>[0.003] | -0.025***<br>[0.003] |
| Foreign born                       | 0.15<br>[0.009]         | 0.133<br>[0.009] | -0.016*<br>[0.010]   | 0.151<br>[0.009]                                              | 0.131<br>[0.009] | -0.020**<br>[0.010]  |
| Lowest Soc. Sec. earnings quartile | 0.177<br>[0.005]        | 0.138<br>[0.006] | -0.039***<br>[0.006] | 0.175<br>[0.005]                                              | 0.137<br>[0.005] | -0.038***<br>[0.006] |
| 2nd quartile                       | 0.146<br>[0.005]        | 0.121<br>[0.006] | -0.025***<br>[0.005] | 0.142<br>[0.005]                                              | 0.122<br>[0.006] | -0.020***<br>[0.005] |
| 3rd quartile                       | 0.092<br>[0.004]        | 0.068<br>[0.004] | -0.024***<br>[0.004] | 0.089<br>[0.004]                                              | 0.07<br>[0.004]  | -0.019***<br>[0.004] |
| Highest Soc Sec. earnings quartile | 0.086<br>[0.004]        | 0.061<br>[0.004] | -0.024***<br>[0.004] | 0.085<br>[0.004]                                              | 0.061<br>[0.004] | -0.024***<br>[0.004] |

\* Sample: Health and Retirement Study, 2000-2016, Age 65+. The sample includes 21,442 individuals and 97,629 person-year observations. The 2000 and 2016 values are estimated after fitting a linear time trend on the data. The unadjusted models do not adjust the samples to compositional changes. The age-, education-, demographics-, & health-adjusted models adjust the distributions of age, education, income, race and ethnicity, foreign-born status, marital status, hypertension, diabetes, stroke, and heart problems in the 2000 and 2016 samples to the overall sample mean between 2000 and 2016. The age-adjusted versions only adjust the distribution of age.

**Table S10.** Descriptive statistics in the analytic sample.

| N = 97,629                              | Unweighted frequency | Unweighted fraction | Weighted fraction |
|-----------------------------------------|----------------------|---------------------|-------------------|
| Men                                     | 40934                | 0.419               | 0.428             |
| Women                                   | 56695                | 0.581               | 0.572             |
| Age 65-69                               | 25972                | 0.266               | 0.301             |
| Age 70-74                               | 23787                | 0.244               | 0.239             |
| Age 75-79                               | 20053                | 0.205               | 0.189             |
| Age 80-84                               | 14362                | 0.147               | 0.141             |
| Age 85-89                               | 8573                 | 0.088               | 0.084             |
| Age 90-94                               | 3762                 | 0.039               | 0.036             |
| Age 95+                                 | 1120                 | 0.011               | 0.010             |
| Non-Hispanic White                      | 74061                | 0.759               | 0.824             |
| Non-Hispanic Black                      | 13324                | 0.136               | 0.086             |
| Non-Hispanic other                      | 1953                 | 0.020               | 0.022             |
| Hispanic                                | 8266                 | 0.085               | 0.068             |
| Race/ethnicity missing                  | 25                   | 0.000               | 0.000             |
| Born in the U.S.                        | 87498                | 0.896               | 0.906             |
| Foreign born                            | 10023                | 0.103               | 0.093             |
| Birth country missing                   | 108                  | 0.001               | 0.001             |
| Less than high school                   | 29286                | 0.300               | 0.263             |
| High school                             | 31048                | 0.318               | 0.318             |
| Some college                            | 19173                | 0.196               | 0.206             |
| College or more                         | 18104                | 0.185               | 0.213             |
| Education missing                       | 18                   | 0.000               | 0.000             |
| Lowest Social Security income quartile  | 20890                | 0.214               | 0.200             |
| 2nd quartile                            | 24083                | 0.247               | 0.237             |
| 3rd quartile                            | 25787                | 0.264               | 0.261             |
| Highest Social Security income quartile | 24748                | 0.253               | 0.279             |
| Social Security income missing          | 2121                 | 0.022               | 0.023             |
| Married/partnered                       | 56337                | 0.577               | 0.574             |
| Single                                  | 41239                | 0.422               | 0.426             |
| Marital status missing                  | 53                   | 0.001               | 0.001             |
| Never had a stroke                      | 86849                | 0.890               | 0.896             |
| Had a stroke                            | 10700                | 0.110               | 0.103             |
| Stroke missing                          | 80                   | 0.001               | 0.001             |
| Survey wave 2000                        | 10737                | 0.110               | 0.094             |
| Survey wave 2002                        | 10941                | 0.112               | 0.098             |
| Survey wave 2004                        | 11113                | 0.114               | 0.099             |
| Survey wave 2006                        | 11403                | 0.117               | 0.103             |
| Survey wave 2008                        | 11352                | 0.116               | 0.107             |
| Survey wave 2010                        | 10951                | 0.112               | 0.113             |
| Survey wave 2012                        | 10751                | 0.110               | 0.120             |
| Survey wave 2014                        | 10387                | 0.106               | 0.127             |
| Survey wave 2016                        | 9994                 | 0.102               | 0.138             |

\* Sample: Health and Retirement Study, 2000-2016, Age 65+. The sample includes 21,442 individuals and 97,629 person-year observations.

**Table S11.** Comparing our dementia prevalence estimates to Plassman et al. (5).

| Group              | Period    | Source          | Prevalence | 95% CI         |
|--------------------|-----------|-----------------|------------|----------------|
| Age 71+            | 2001-2003 | Plassman et al. | 0.139      | [0.114; 0.164] |
| Age 71+            | 2002      | own estimate    | 0.146      | [0.139; 0.152] |
| Age 71+, males     | 2001-2003 | Plassman et al. | 0.111      | [0.078; 0.145] |
| Age 71+, males     | 2002      | own estimate    | 0.122      | [0.114; 0.13]  |
| Age 71+, females   | 2001-2003 | Plassman et al. | 0.157      | [0.124; 0.191] |
| Age 71+, females   | 2002      | own estimate    | 0.161      | [0.153; 0.169] |
| Age 71-79          | 2001-2003 | Plassman et al. | 0.050      | [0.026; 0.073] |
| Age 71-79          | 2002      | own estimate    | 0.072      | [0.066; 0.078] |
| Age 71-79, males   | 2001-2003 | Plassman et al. | 0.053      | [0.013; 0.093] |
| Age 71-79, males   | 2002      | own estimate    | 0.074      | [0.066; 0.082] |
| Age 71-79, females | 2001-2003 | Plassman et al. | 0.048      | [0.018; 0.077] |
| Age 71-79, females | 2002      | own estimate    | 0.070      | [0.063; 0.077] |
| Age 80-89          | 2001-2003 | Plassman et al. | 0.242      | [0.193; 0.291] |
| Age 80-89          | 2002      | own estimate    | 0.214      | [0.204; 0.224] |
| Age 80-89, males   | 2001-2003 | Plassman et al. | 0.177      | [0.117; 0.237] |
| Age 80-89, males   | 2002      | own estimate    | 0.189      | [0.174; 0.203] |
| Age 80-89, females | 2001-2003 | Plassman et al. | 0.278      | [0.204; 0.353] |
| Age 80-89, females | 2002      | own estimate    | 0.228      | [0.216; 0.24]  |
| Age 90+            | 2001-2003 | Plassman et al. | 0.374      | [0.255; 0.493] |
| Age 90+            | 2002      | own estimate    | 0.479      | [0.454; 0.504] |
| Age 90+, males     | 2001-2003 | Plassman et al. | 0.446      | [0.217; 0.675] |
| Age 90+, males     | 2002      | own estimate    | 0.351      | [0.31; 0.392]  |
| Age 90+, females   | 2001-2003 | Plassman et al. | 0.347      | [0.234; 0.460] |
| Age 90+, females   | 2002      | own estimate    | 0.526      | [0.497; 0.556] |



**Table S12.** Estimated prevalence of dementia in 2002 by race and ethnicity: comparison of methods.

|                    | N    | mean  | S.e.  | CI low | CI high |
|--------------------|------|-------|-------|--------|---------|
| Non-Hispanic White |      |       |       |        |         |
| ADAMS wave 1       | 592  | 0.124 | 0.014 | 0.097  | 0.150   |
| Our model, 2002    | 5689 | 0.136 | 0.003 | 0.129  | 0.142   |
| Cutoff, 2002       | 5686 | 0.116 | 0.004 | 0.107  | 0.124   |
| Non-Hispanic Black |      |       |       |        |         |
| ADAMS wave 1       | 159  | 0.222 | 0.033 | 0.157  | 0.287   |
| Our model, 2002    | 771  | 0.228 | 0.009 | 0.210  | 0.246   |
| Cutoff, 2002       | 771  | 0.285 | 0.016 | 0.253  | 0.317   |

\* Age 71+. Dementia status was directly observed in ADAMS wave 1 interviews conducted between 2001 and 2003. The cutoff method follows the widely used methodology discussed by Crimmins et al. (8). In self-interviews, it sums responses to 27 items from the HRS cognitive battery. If the score is below a cutoff level, the respondent is assumed to have dementia. A similar method is used for proxy-interviews. CI low and CI high denote the 95% confidence interval. S.e. of Cutoff not adjusted upward for model and estimation uncertainty. All statistics are weighted.

**Table S13.** Output of the model estimated on HRS data.

|                                          | Coef.  | 95% CI           |
|------------------------------------------|--------|------------------|
| <i><u>Latent cognition</u></i>           |        |                  |
| Constant                                 | 1.214  | [1.125; 1.304]   |
| Female                                   | 0.220  | [0.158; 0.282]   |
| Non-Hispanic Black                       | -0.255 | [-0.34; -0.171]  |
| Non-Hispanic other                       | -0.317 | [-0.513; -0.121] |
| Hispanic                                 | -0.058 | [-0.176; 0.06]   |
| High school dropout                      | -0.132 | [-0.213; -0.051] |
| Some college                             | 0.097  | [0.001; 0.193]   |
| College or more                          | 0.198  | [0.091; 0.306]   |
| Foreign born                             | -0.091 | [-0.205; 0.024]  |
| Lowest Social Security income quartile   | -0.122 | [-0.203; -0.041] |
| 3rd Social Security income quartile      | 0.195  | [0.108; 0.281]   |
| Highest Social Security income quartile  | 0.091  | [-0.006; 0.189]  |
| Single                                   | -0.087 | [-0.144; -0.031] |
| Had a stroke                             | -0.446 | [-0.533; -0.359] |
| Birthyear (decades after 1930, BY)       | -0.099 | [-0.14; -0.057]  |
| BY x female                              | -0.034 | [-0.061; -0.006] |
| BY x Non-Hispanic Black                  | 0.090  | [0.051; 0.129]   |
| BY x Non-Hispanic other                  | 0.080  | [-0.013; 0.173]  |
| BY x Hispanic                            | 0.055  | [-0.002; 0.112]  |
| BY x High school dropout                 | 0.035  | [-0.001; 0.071]  |
| BY x Some college                        | 0.023  | [-0.016; 0.061]  |
| BY x College or more                     | 0.089  | [0.049; 0.128]   |
| BY x Foreign born                        | 0.007  | [-0.043; 0.056]  |
| BY x Lowest Social Security income q.    | 0.056  | [0.018; 0.095]   |
| BY x 3rd Social Security income quartile | -0.026 | [-0.067; 0.015]  |
| BY x Highest Social Security income q.   | 0.014  | [-0.026; 0.055]  |
| BY x Single                              | -0.031 | [-0.05; -0.011]  |
| BY x Had a stroke                        | -0.035 | [-0.059; -0.01]  |
| Age (decades after 65)                   | -0.781 | [-0.835; -0.728] |
| Age squared                              | -0.385 | [-0.415; -0.355] |
| Age cube                                 | -0.066 | [-0.085; -0.047] |
| BY x Age                                 | 0.094  | [0.068; 0.121]   |
| BY x Age squared                         | 0.058  | [0.033; 0.082]   |
| BY x Age cube                            | -0.038 | [-0.047; -0.029] |
| <i><u>Residual distribution</u></i>      |        |                  |
| Random intercept std                     | 0.850  | [0.808; 0.893]   |
| Random growth std                        | 0.720  | [0.682; 0.758]   |
| Intercept-growth correlation             | 0.554  | [0.535; 0.574]   |
| Error std                                | 0.127  | [0.116; 0.138]   |
| <i><u>Proxy selection</u></i>            |        |                  |
| Constant                                 | -0.197 | [-0.31; -0.085]  |
| Female                                   | -0.343 | [-0.409; -0.277] |
| Non-Hispanic Black                       | -0.046 | [-0.133; 0.04]   |
| Non-Hispanic other                       | 0.188  | [-0.009; 0.385]  |
| Hispanic                                 | 0.087  | [-0.033; 0.208]  |

|                                         |        |                  |
|-----------------------------------------|--------|------------------|
| High school dropout                     | 0.253  | [0.169; 0.336]   |
| Some college                            | -0.094 | [-0.196; 0.009]  |
| College or more                         | -0.111 | [-0.226; 0.004]  |
| Foreign born                            | 0.045  | [-0.073; 0.162]  |
| Lowest Social Security income quartile  | -0.046 | [-0.13; 0.038]   |
| 3rd Social Security income quartile     | 0.067  | [-0.025; 0.158]  |
| Highest Social Security income quartile | 0.088  | [-0.014; 0.19]   |
| Single                                  | -0.339 | [-0.407; -0.271] |
| Had a stroke                            | -0.100 | [-0.201; 0.001]  |
| Survey wave 2002                        | 0.059  | [-0.006; 0.124]  |
| Survey wave 2004                        | -0.065 | [-0.132; 0.001]  |
| Survey wave 2006                        | -0.266 | [-0.334; -0.197] |
| Survey wave 2008                        | -0.269 | [-0.338; -0.2]   |
| Survey wave 2010                        | -0.113 | [-0.182; -0.043] |
| Survey wave 2012                        | -0.288 | [-0.359; -0.217] |
| Survey wave 2014                        | -0.325 | [-0.397; -0.253] |
| Survey wave 2016                        | -0.335 | [-0.41; -0.261]  |
| Age (decades after 65)                  | -0.251 | [-0.306; -0.197] |
| Age squared                             | 0.063  | [0.022; 0.105]   |
| Age cube                                | 0.036  | [0.016; 0.057]   |
| Cognition                               | -0.940 | [-1.006; -0.875] |
| Cognition x 2002                        | 0.015  | [-0.042; 0.072]  |
| Cognition x 2004                        | -0.018 | [-0.079; 0.042]  |
| Cognition x 2006                        | -0.106 | [-0.172; -0.039] |
| Cognition x 2008                        | -0.144 | [-0.213; -0.075] |
| Cognition x 2010                        | -0.218 | [-0.29; -0.147]  |
| Cognition x 2012                        | -0.244 | [-0.319; -0.169] |
| Cognition x 2014                        | -0.193 | [-0.268; -0.117] |
| Cognition x 2016                        | -0.212 | [-0.294; -0.13]  |
| <hr/> <i>Subjective limitations</i>     |        |                  |
| Constant                                | 6.700  | [6.545; 6.855]   |
| Female                                  | 0.054  | [-0.041; 0.149]  |
| Non-Hispanic Black                      | 0.092  | [-0.032; 0.217]  |
| Non-Hispanic other                      | -0.203 | [-0.489; 0.084]  |
| Hispanic                                | 0.483  | [0.307; 0.658]   |
| High school dropout                     | 0.585  | [0.462; 0.708]   |
| Some college                            | -0.074 | [-0.222; 0.074]  |
| College or more                         | -0.322 | [-0.491; -0.153] |
| Foreign born                            | -0.057 | [-0.23; 0.116]   |
| Lowest Social Security income quartile  | 0.032  | [-0.09; 0.154]   |
| 3rd Social Security income quartile     | 0.050  | [-0.083; 0.183]  |
| Highest Social Security income quartile | -0.216 | [-0.365; -0.067] |
| Single                                  | -0.115 | [-0.21; -0.019]  |
| Had a stroke                            | 0.531  | [0.379; 0.683]   |
| Age (decades after 65)                  | -0.045 | [-0.117; 0.028]  |
| Cognition                               | -1.657 | [-1.738; -1.576] |
| <i>Residual distribution</i>            |        |                  |
| Error std                               | 1.735  | [1.724; 1.746]   |
| <hr/> <i>Immediate word recall</i>      |        |                  |

|                                         |        |                  |
|-----------------------------------------|--------|------------------|
| Constant                                | 3.269  | [3.169; 3.369]   |
| Female                                  | 0.470  | [0.41; 0.531]    |
| Non-Hispanic Black                      | -0.247 | [-0.328; -0.167] |
| Non-Hispanic other                      | -0.167 | [-0.352; 0.018]  |
| Hispanic                                | -0.350 | [-0.464; -0.237] |
| High school dropout                     | -0.527 | [-0.606; -0.448] |
| Some college                            | 0.171  | [0.077; 0.265]   |
| College or more                         | 0.460  | [0.353; 0.568]   |
| Foreign born                            | 0.066  | [-0.045; 0.177]  |
| Lowest Social Security income quartile  | -0.010 | [-0.089; 0.068]  |
| 3rd Social Security income quartile     | -0.073 | [-0.158; 0.013]  |
| Highest Social Security income quartile | 0.148  | [0.053; 0.243]   |
| Single                                  | 0.068  | [0.006; 0.129]   |
| Had a stroke                            | 0.153  | [0.056; 0.25]    |
| Age (decades after 65)                  | -0.385 | [-0.432; -0.339] |
| First time responder                    | -0.156 | [-0.246; -0.066] |
| Cognition                               | 1.043  | [0.991; 1.095]   |
| <i>Residual distribution</i>            |        |                  |
| Error std                               | 1.283  | [1.276; 1.29]    |
| <hr/>                                   |        |                  |
| <u><i>Delayed word recall</i></u>       |        |                  |
| Constant                                | -0.790 | [-0.856; -0.724] |
| Female                                  | 0.132  | [0.094; 0.169]   |
| Non-Hispanic Black                      | -0.365 | [-0.415; -0.314] |
| Non-Hispanic other                      | -0.054 | [-0.171; 0.063]  |
| Hispanic                                | 0.014  | [-0.057; 0.086]  |
| High school dropout                     | -0.209 | [-0.257; -0.16]  |
| Some college                            | 0.034  | [-0.022; 0.091]  |
| College or more                         | 0.101  | [0.037; 0.165]   |
| Foreign born                            | -0.004 | [-0.073; 0.064]  |
| Lowest Social Security income quartile  | -0.012 | [-0.061; 0.038]  |
| 3rd Social Security income quartile     | -0.015 | [-0.066; 0.037]  |
| Highest Social Security income quartile | 0.074  | [0.017; 0.131]   |
| Single                                  | 0.071  | [0.033; 0.109]   |
| Had a stroke                            | 0.103  | [0.043; 0.163]   |
| Age (decades after 65)                  | -0.247 | [-0.275; -0.218] |
| First time responder                    | -0.202 | [-0.293; -0.111] |
| Immediate word recall                   | 0.755  | [0.747; 0.763]   |
| Cognition                               | 0.578  | [0.544; 0.611]   |
| <i>Residual distribution</i>            |        |                  |
| Error std                               | 1.307  | [1.3; 1.313]     |
| <hr/>                                   |        |                  |
| <u><i>Serial 7</i></u>                  |        |                  |
| Constant                                | 2.243  | [2.07; 2.415]    |
| Female                                  | -0.833 | [-0.937; -0.728] |
| Non-Hispanic Black                      | -1.562 | [-1.701; -1.423] |
| Non-Hispanic other                      | -0.647 | [-0.968; -0.326] |
| Hispanic                                | -1.210 | [-1.406; -1.014] |
| High school dropout                     | -1.384 | [-1.519; -1.248] |
| Some college                            | 0.300  | [0.138; 0.462]   |
| College or more                         | 0.807  | [0.623; 0.992]   |

|                                         |        |                  |
|-----------------------------------------|--------|------------------|
| Foreign born                            | 0.573  | [0.381; 0.765]   |
| Lowest Social Security income quartile  | -0.142 | [-0.278; -0.005] |
| 3rd Social Security income quartile     | -0.078 | [-0.224; 0.069]  |
| Highest Social Security income quartile | 0.218  | [0.056; 0.381]   |
| Single                                  | 0.139  | [0.033; 0.245]   |
| Had a stroke                            | 0.310  | [0.142; 0.478]   |
| Age (decades after 65)                  | 0.191  | [0.111; 0.271]   |
| First time responder                    | -0.255 | [-0.425; -0.084] |
| Cognition                               | 1.775  | [1.685; 1.865]   |
| <i>Residual distribution</i>            |        |                  |
| Error std                               | 2.227  | [2.209; 2.246]   |

---

|                                         |        |                  |
|-----------------------------------------|--------|------------------|
| <i><u>Mental status</u></i>             |        |                  |
| Constant                                | 7.970  | [7.816; 8.124]   |
| Female                                  | 0.140  | [0.046; 0.234]   |
| Non-Hispanic Black                      | -0.876 | [-0.999; -0.752] |
| Non-Hispanic other                      | -0.523 | [-0.808; -0.237] |
| Hispanic                                | -0.530 | [-0.704; -0.355] |
| High school dropout                     | -0.723 | [-0.844; -0.602] |
| Some college                            | 0.053  | [-0.092; 0.198]  |
| College or more                         | 0.178  | [0.013; 0.343]   |
| Foreign born                            | -0.122 | [-0.293; 0.049]  |
| Lowest Social Security income quartile  | -0.147 | [-0.268; -0.025] |
| 3rd Social Security income quartile     | -0.137 | [-0.268; -0.006] |
| Highest Social Security income quartile | 0.008  | [-0.138; 0.154]  |
| Single                                  | 0.185  | [0.09; 0.28]     |
| Had a stroke                            | 0.171  | [0.022; 0.32]    |
| Age (decades after 65)                  | -0.247 | [-0.318; -0.176] |
| First time responder                    | -0.249 | [-0.415; -0.083] |
| Cognition                               | 1.567  | [1.487; 1.646]   |
| <i>Residual distribution</i>            |        |                  |
| Error std                               | 2.009  | [1.99; 2.029]    |

---

|                                         |        |                  |
|-----------------------------------------|--------|------------------|
| <i><u>Interviewer assessment</u></i>    |        |                  |
| Constant                                | -0.340 | [-0.636; -0.043] |
| Female                                  | 0.181  | [-0.026; 0.388]  |
| Non-Hispanic Black                      | 0.064  | [-0.195; 0.322]  |
| Non-Hispanic other                      | -0.923 | [-1.508; -0.337] |
| Hispanic                                | 0.291  | [-0.048; 0.629]  |
| High school dropout                     | 0.300  | [0.057; 0.542]   |
| Some college                            | 0.148  | [-0.168; 0.464]  |
| College or more                         | 0.125  | [-0.222; 0.473]  |
| Foreign born                            | -0.604 | [-0.928; -0.28]  |
| Lowest Social Security income quartile  | -0.156 | [-0.406; 0.094]  |
| 3rd Social Security income quartile     | 0.107  | [-0.165; 0.379]  |
| Highest Social Security income quartile | -0.179 | [-0.474; 0.116]  |
| Single                                  | 0.913  | [0.686; 1.139]   |
| Had a stroke                            | 0.577  | [0.312; 0.841]   |
| Age (decades after 65)                  | 0.200  | [0.062; 0.338]   |
| Cognition                               | -2.216 | [-2.408; -2.025] |
| <i>Residual distribution</i>            |        |                  |

|                                         |        |                  |
|-----------------------------------------|--------|------------------|
| Error std                               | 2.228  | [2.086; 2.37]    |
| <i>Proxy-reported problems</i>          |        |                  |
| Constant                                | -0.881 | [-1.059; -0.702] |
| Female                                  | 0.252  | [0.128; 0.376]   |
| Non-Hispanic Black                      | -0.189 | [-0.341; -0.037] |
| Non-Hispanic other                      | -0.464 | [-0.82; -0.107]  |
| Hispanic                                | 0.324  | [0.124; 0.523]   |
| High school dropout                     | 0.119  | [-0.023; 0.261]  |
| Some college                            | 0.100  | [-0.082; 0.283]  |
| College or more                         | 0.294  | [0.092; 0.495]   |
| Foreign born                            | -0.327 | [-0.517; -0.138] |
| Lowest Social Security income quartile  | -0.018 | [-0.162; 0.127]  |
| 3rd Social Security income quartile     | 0.242  | [0.083; 0.401]   |
| Highest Social Security income quartile | -0.016 | [-0.189; 0.156]  |
| Single                                  | 0.211  | [0.078; 0.344]   |
| Had a stroke                            | -0.016 | [-0.163; 0.13]   |
| Age (decades after 65)                  | -0.203 | [-0.285; -0.121] |
| Cognition                               | -1.193 | [-1.273; -1.113] |
| <i>Residual distribution</i>            |        |                  |
| Error std                               | 1.681  | [1.634; 1.728]   |
| <i>Subjective limitations missing</i>   |        |                  |
| Constant                                | -2.799 | [-3; -2.598]     |
| Female                                  | 0.040  | [-0.065; 0.144]  |
| Non-Hispanic Black                      | -0.011 | [-0.143; 0.121]  |
| Non-Hispanic other                      | -0.094 | [-0.413; 0.226]  |
| Hispanic                                | -0.181 | [-0.378; 0.016]  |
| High school dropout                     | 0.020  | [-0.096; 0.136]  |
| Some college                            | -0.125 | [-0.272; 0.021]  |
| College or more                         | -0.117 | [-0.275; 0.041]  |
| Foreign born                            | 0.222  | [0.075; 0.369]   |
| Lowest Social Security income quartile  | 0.044  | [-0.094; 0.183]  |
| 3rd Social Security income quartile     | 0.134  | [-0.003; 0.27]   |
| Highest Social Security income quartile | -0.026 | [-0.185; 0.133]  |
| Single                                  | 0.161  | [0.053; 0.268]   |
| Had a stroke                            | -0.022 | [-0.152; 0.109]  |
| 2002 wave                               | -0.244 | [-0.482; -0.005] |
| 2004 wave                               | -0.035 | [-0.237; 0.167]  |
| 2006 wave                               | 0.026  | [-0.171; 0.222]  |
| 2008 wave                               | -0.095 | [-0.308; 0.117]  |
| 2010 wave                               | -0.044 | [-0.252; 0.163]  |
| 2012 wave                               | -0.053 | [-0.267; 0.161]  |
| 2014 wave                               | 0.067  | [-0.129; 0.262]  |
| 2016 wave                               | 0.140  | [-0.055; 0.335]  |
| Age (decades after 65)                  | -0.031 | [-0.098; 0.036]  |
| Cognition                               | -0.286 | [-0.397; -0.175] |
| Cognition x 2002 wave                   | 0.112  | [-0.063; 0.287]  |
| Cognition x 2004 wave                   | 0.026  | [-0.125; 0.177]  |
| Cognition x 2006 wave                   | 0.040  | [-0.106; 0.186]  |
| Cognition x 2008 wave                   | 0.027  | [-0.133; 0.186]  |

|                                             |        |                  |
|---------------------------------------------|--------|------------------|
| Cognition x 2010 wave                       | 0.091  | [-0.065; 0.247]  |
| Cognition x 2012 wave                       | 0.150  | [-0.009; 0.308]  |
| Cognition x 2014 wave                       | -0.020 | [-0.165; 0.126]  |
| Cognition x 2016 wave                       | 0.069  | [-0.08; 0.218]   |
| <hr/>                                       |        |                  |
| <i><u>Immediate word recall missing</u></i> |        |                  |
| Constant                                    | -1.443 | [-1.568; -1.318] |
| Female                                      | -0.055 | [-0.113; 0.002]  |
| Non-Hispanic Black                          | -0.081 | [-0.161; -0.001] |
| Non-Hispanic other                          | -0.169 | [-0.372; 0.035]  |
| Hispanic                                    | -0.067 | [-0.182; 0.049]  |
| High school dropout                         | 0.053  | [-0.02; 0.126]   |
| Some college                                | 0.055  | [-0.026; 0.137]  |
| College or more                             | 0.047  | [-0.042; 0.137]  |
| Foreign born                                | -0.076 | [-0.181; 0.029]  |
| Lowest Social Security income quartile      | 0.024  | [-0.053; 0.102]  |
| 3rd Social Security income quartile         | 0.003  | [-0.075; 0.082]  |
| Highest Social Security income quartile     | -0.003 | [-0.087; 0.082]  |
| Single                                      | 0.013  | [-0.047; 0.073]  |
| Had a stroke                                | -0.208 | [-0.297; -0.12]  |
| 2002 wave                                   | 0.049  | [-0.075; 0.173]  |
| 2004 wave                                   | -0.076 | [-0.203; 0.05]   |
| 2006 wave                                   | -0.146 | [-0.273; -0.019] |
| 2008 wave                                   | -0.181 | [-0.309; -0.053] |
| 2010 wave                                   | -0.186 | [-0.32; -0.051]  |
| 2012 wave                                   | -0.130 | [-0.258; -0.002] |
| 2014 wave                                   | -0.261 | [-0.395; -0.128] |
| 2016 wave                                   | -0.169 | [-0.302; -0.035] |
| Age (decades after 65)                      | -0.086 | [-0.127; -0.045] |
| First self-interview in HRS                 | 0.269  | [0.091; 0.447]   |
| Cognition                                   | -0.743 | [-0.842; -0.644] |
| Cognition x 2002 wave                       | 0.238  | [0.124; 0.351]   |
| Cognition x 2004 wave                       | 0.199  | [0.08; 0.318]    |
| Cognition x 2006 wave                       | 0.166  | [0.043; 0.289]   |
| Cognition x 2008 wave                       | 0.133  | [0.006; 0.26]    |
| Cognition x 2010 wave                       | 0.260  | [0.134; 0.386]   |
| Cognition x 2012 wave                       | 0.325  | [0.207; 0.444]   |
| Cognition x 2014 wave                       | 0.151  | [0.016; 0.286]   |
| Cognition x 2016 wave                       | 0.178  | [0.044; 0.312]   |
| <hr/>                                       |        |                  |
| <i><u>Delayed word recall missing</u></i>   |        |                  |
| Constant                                    | -0.979 | [-1.11; -0.847]  |
| Female                                      | 0.040  | [-0.012; 0.091]  |
| Non-Hispanic Black                          | 0.019  | [-0.048; 0.086]  |
| Non-Hispanic other                          | 0.184  | [0.036; 0.332]   |
| Hispanic                                    | -0.002 | [-0.097; 0.093]  |
| High school dropout                         | 0.112  | [0.05; 0.174]    |
| Some college                                | 0.034  | [-0.04; 0.107]   |
| College or more                             | 0.102  | [0.023; 0.181]   |
| Foreign born                                | -0.052 | [-0.138; 0.035]  |
| Lowest Social Security income quartile      | 0.004  | [-0.063; 0.07]   |

|                                         |        |                  |
|-----------------------------------------|--------|------------------|
| 3rd Social Security income quartile     | 0.029  | [-0.039; 0.096]  |
| Highest Social Security income quartile | 0.015  | [-0.059; 0.088]  |
| Single                                  | 0.023  | [-0.03; 0.077]   |
| Had a stroke                            | -0.119 | [-0.192; -0.046] |
| 2002 wave                               | 0.298  | [0.158; 0.438]   |
| 2004 wave                               | 0.127  | [-0.014; 0.268]  |
| 2006 wave                               | 0.074  | [-0.066; 0.213]  |
| 2008 wave                               | -0.005 | [-0.148; 0.138]  |
| 2010 wave                               | 0.372  | [0.236; 0.507]   |
| 2012 wave                               | 0.438  | [0.306; 0.57]    |
| 2014 wave                               | 0.350  | [0.217; 0.483]   |
| 2016 wave                               | 0.320  | [0.183; 0.456]   |
| Age (decades after 65)                  | 0.009  | [-0.025; 0.044]  |
| First self-interview in HRS             | 0.048  | [-0.157; 0.253]  |
| Immediate word recall                   | -0.288 | [-0.307; -0.269] |
| Immediate word recall missing           | 3.533  | [3.425; 3.642]   |
| Cognition                               | -0.449 | [-0.569; -0.329] |
| Cognition x 2002 wave                   | 0.370  | [0.239; 0.5]     |
| Cognition x 2004 wave                   | 0.109  | [-0.033; 0.251]  |
| Cognition x 2006 wave                   | 0.109  | [-0.033; 0.251]  |
| Cognition x 2008 wave                   | -0.002 | [-0.156; 0.152]  |
| Cognition x 2010 wave                   | 0.154  | [0.017; 0.291]   |
| Cognition x 2012 wave                   | 0.110  | [-0.026; 0.246]  |
| Cognition x 2014 wave                   | 0.164  | [0.028; 0.301]   |
| Cognition x 2016 wave                   | 0.200  | [0.06; 0.34]     |
| <hr/> <i>Serial 7 missing</i>           |        |                  |
| Constant                                | -1.401 | [-1.512; -1.289] |
| Female                                  | 0.443  | [0.388; 0.499]   |
| Non-Hispanic Black                      | 0.172  | [0.105; 0.238]   |
| Non-Hispanic other                      | 0.124  | [-0.038; 0.287]  |
| Hispanic                                | 0.123  | [0.027; 0.219]   |
| High school dropout                     | 0.415  | [0.35; 0.479]    |
| Some college                            | -0.050 | [-0.13; 0.031]   |
| College or more                         | -0.212 | [-0.308; -0.116] |
| Foreign born                            | -0.192 | [-0.286; -0.097] |
| Lowest Social Security income quartile  | 0.092  | [0.024; 0.16]    |
| 3rd Social Security income quartile     | 0.050  | [-0.022; 0.123]  |
| Highest Social Security income quartile | 0.052  | [-0.028; 0.133]  |
| Single                                  | -0.069 | [-0.123; -0.015] |
| Had a stroke                            | -0.230 | [-0.311; -0.148] |
| 2002 wave                               | -0.064 | [-0.169; 0.04]   |
| 2004 wave                               | -0.118 | [-0.222; -0.013] |
| 2006 wave                               | -0.385 | [-0.494; -0.276] |
| 2008 wave                               | -0.280 | [-0.386; -0.174] |
| 2010 wave                               | -0.415 | [-0.531; -0.3]   |
| 2012 wave                               | -0.339 | [-0.45; -0.228]  |
| 2014 wave                               | -0.529 | [-0.647; -0.41]  |
| 2016 wave                               | -0.424 | [-0.54; -0.308]  |
| Age (decades after 65)                  | -0.178 | [-0.217; -0.14]  |



|                                                     |        |                  |
|-----------------------------------------------------|--------|------------------|
| First self-interview in HRS                         | 0.115  | [-0.059; 0.288]  |
| Cognition                                           | -0.688 | [-0.761; -0.615] |
| Cognition x 2002 wave                               | -0.017 | [-0.108; 0.074]  |
| Cognition x 2004 wave                               | 0.076  | [-0.012; 0.164]  |
| Cognition x 2006 wave                               | 0.150  | [0.058; 0.242]   |
| Cognition x 2008 wave                               | 0.092  | [0; 0.184]       |
| Cognition x 2010 wave                               | 0.045  | [-0.061; 0.15]   |
| Cognition x 2012 wave                               | 0.134  | [0.037; 0.231]   |
| Cognition x 2014 wave                               | 0.149  | [0.043; 0.255]   |
| Cognition x 2016 wave                               | 0.116  | [0.009; 0.223]   |
| <hr/> <i><u>Mental status missing</u></i>           |        |                  |
| Constant                                            | -1.747 | [-1.887; -1.606] |
| Female                                              | 0.027  | [-0.042; 0.097]  |
| Non-Hispanic Black                                  | 0.168  | [0.081; 0.255]   |
| Non-Hispanic other                                  | 0.039  | [-0.176; 0.254]  |
| Hispanic                                            | 0.100  | [-0.028; 0.227]  |
| High school dropout                                 | 0.306  | [0.218; 0.394]   |
| Some college                                        | 0.125  | [0.02; 0.229]    |
| College or more                                     | 0.191  | [0.078; 0.303]   |
| Foreign born                                        | -0.103 | [-0.224; 0.017]  |
| Lowest Social Security income quartile              | 0.053  | [-0.037; 0.143]  |
| 3rd Social Security income quartile                 | 0.012  | [-0.087; 0.11]   |
| Highest Social Security income quartile             | 0.029  | [-0.078; 0.135]  |
| Single                                              | -0.026 | [-0.098; 0.046]  |
| Had a stroke                                        | -0.283 | [-0.391; -0.176] |
| 2002 wave                                           | -0.065 | [-0.197; 0.068]  |
| 2004 wave                                           | -0.181 | [-0.315; -0.047] |
| 2006 wave                                           | -0.192 | [-0.324; -0.06]  |
| 2008 wave                                           | -0.285 | [-0.422; -0.147] |
| 2010 wave                                           | -0.320 | [-0.467; -0.173] |
| 2012 wave                                           | -0.299 | [-0.441; -0.157] |
| 2014 wave                                           | -0.375 | [-0.522; -0.228] |
| 2016 wave                                           | -0.285 | [-0.428; -0.143] |
| Age (decades after 65)                              | -0.149 | [-0.202; -0.096] |
| First self-interview in HRS                         | 0.333  | [0.141; 0.524]   |
| Age exactly 65                                      | 0.867  | [0.78; 0.954]    |
| Cognition                                           | -0.745 | [-0.841; -0.65]  |
| Cognition x 2002 wave                               | 0.089  | [-0.031; 0.209]  |
| Cognition x 2004 wave                               | 0.045  | [-0.08; 0.17]    |
| Cognition x 2006 wave                               | 0.206  | [0.089; 0.322]   |
| Cognition x 2008 wave                               | 0.054  | [-0.08; 0.188]   |
| Cognition x 2010 wave                               | 0.023  | [-0.124; 0.17]   |
| Cognition x 2012 wave                               | 0.093  | [-0.043; 0.229]  |
| Cognition x 2014 wave                               | 0.176  | [0.039; 0.312]   |
| Cognition x 2016 wave                               | 0.021  | [-0.125; 0.166]  |
| <hr/> <i><u>Proxy-reported problems missing</u></i> |        |                  |
| Constant                                            | -2.081 | [-2.301; -1.86]  |
| Female                                              | 0.094  | [-0.012; 0.2]    |
| Non-Hispanic Black                                  | 0.037  | [-0.086; 0.159]  |

|                                         |        |                  |
|-----------------------------------------|--------|------------------|
| Non-Hispanic other                      | -0.194 | [-0.506; 0.119]  |
| Hispanic                                | -0.169 | [-0.348; 0.01]   |
| High school dropout                     | 0.001  | [-0.113; 0.115]  |
| Some college                            | 0.058  | [-0.087; 0.204]  |
| College or more                         | 0.160  | [0.004; 0.316]   |
| Foreign born                            | 0.025  | [-0.123; 0.173]  |
| Lowest Social Security income quartile  | -0.067 | [-0.185; 0.052]  |
| 3rd Social Security income quartile     | 0.048  | [-0.082; 0.177]  |
| Highest Social Security income quartile | 0.036  | [-0.097; 0.17]   |
| Single                                  | 0.058  | [-0.058; 0.174]  |
| Had a stroke                            | 0.009  | [-0.093; 0.112]  |
| 2002 wave                               | 0.597  | [0.389; 0.805]   |
| 2004 wave                               | 0.178  | [-0.061; 0.417]  |
| 2006 wave                               | 0.295  | [0.047; 0.543]   |
| 2008 wave                               | 0.006  | [-0.287; 0.299]  |
| 2010 wave                               | 0.204  | [-0.05; 0.458]   |
| 2012 wave                               | 0.006  | [-0.296; 0.308]  |
| 2014 wave                               | 0.050  | [-0.252; 0.352]  |
| 2016 wave                               | 0.270  | [-0.003; 0.544]  |
| Age (decades after 65)                  | -0.090 | [-0.156; -0.024] |
| Cognition                               | -0.350 | [-0.483; -0.216] |
| Cognition x 2002 wave                   | 0.218  | [0.07; 0.366]    |
| Cognition x 2004 wave                   | 0.067  | [-0.099; 0.234]  |
| Cognition x 2006 wave                   | 0.035  | [-0.135; 0.205]  |
| Cognition x 2008 wave                   | -0.178 | [-0.371; 0.016]  |
| Cognition x 2010 wave                   | 0.019  | [-0.158; 0.196]  |
| Cognition x 2012 wave                   | 0.007  | [-0.193; 0.207]  |
| Cognition x 2014 wave                   | -0.085 | [-0.276; 0.106]  |
| Cognition x 2016 wave                   | 0.116  | [-0.075; 0.307]  |
| <hr/>                                   |        |                  |
| <i>ADAMS Selection, 2000, proxy</i>     |        |                  |
| Constant                                | -0.045 | [-0.174; 0.084]  |
| Stratum 1                               | -0.178 | [-0.402; 0.047]  |
| Stratum 2                               | -1.823 | [-2.237; -1.408] |
| Stratum 3                               | -1.872 | [-2.22; -1.523]  |
| Stratum 4                               | -1.829 | [-2.36; -1.297]  |
| Stratum 5                               | -1.368 | [-1.848; -0.889] |
| Stratum 6                               | -1.646 | [-2.133; -1.16]  |
| <hr/>                                   |        |                  |
| <i>ADAMS Selection, 2002, proxy</i>     |        |                  |
| Constant                                | -0.496 | [-0.648; -0.345] |
| Stratum 1                               | 0.561  | [0.312; 0.809]   |
| Stratum 2                               | -0.041 | [-0.31; 0.229]   |
| Stratum 3                               | -0.871 | [-1.152; -0.59]  |
| Stratum 4                               | -0.957 | [-1.368; -0.547] |
| Stratum 5                               | -0.379 | [-0.784; 0.026]  |
| Stratum 6                               | -0.607 | [-0.999; -0.216] |
| <hr/>                                   |        |                  |
| <i>ADAMS Selection, 2000, self</i>      |        |                  |
| Constant                                | -0.282 | [-0.457; -0.107] |
| Stratum 1                               | -0.282 | [-0.516; -0.047] |

|                                      |        |                  |
|--------------------------------------|--------|------------------|
| Stratum 2                            | -1.526 | [-1.746; -1.306] |
| Stratum 3                            | -1.750 | [-2.036; -1.463] |
| Stratum 4                            | -1.766 | [-2.045; -1.488] |
| Stratum 5                            | -1.294 | [-1.598; -0.991] |
| Stratum 6                            | -1.450 | [-1.736; -1.163] |
| Stratum 7                            | -1.650 | [-1.878; -1.422] |
| Stratum 8                            | -1.678 | [-1.891; -1.465] |
| Stratum 9                            | -1.539 | [-1.882; -1.197] |
| Stratum 10                           | -1.384 | [-1.641; -1.126] |
| <hr/>                                |        |                  |
| <i>ADAMS Selection, 2002, self</i>   |        |                  |
| Constant                             | -0.075 | [-0.288; 0.137]  |
| Stratum 1                            | 0.075  | [-0.19; 0.341]   |
| Stratum 2                            | -0.563 | [-0.791; -0.335] |
| Stratum 3                            | -1.351 | [-1.617; -1.086] |
| Stratum 4                            | -1.344 | [-1.603; -1.084] |
| Stratum 5                            | -0.976 | [-1.259; -0.692] |
| Stratum 6                            | -1.069 | [-1.334; -0.804] |
| Stratum 7                            | -1.578 | [-1.82; -1.336]  |
| Stratum 8                            | -1.578 | [-1.811; -1.344] |
| Stratum 9                            | -1.171 | [-1.459; -0.884] |
| Stratum 10                           | -1.316 | [-1.576; -1.056] |
| <hr/>                                |        |                  |
| <i>ADAMS W1 log interview timing</i> |        |                  |
| Constant                             | -1.910 | [-2.026; -1.795] |
| 2002                                 | -0.822 | [-0.973; -0.671] |
| Age                                  | 0.020  | [-0.042; 0.082]  |
| Age x 2002                           | -0.006 | [-0.087; 0.074]  |
| Cognition                            | 0.021  | [-0.012; 0.054]  |
| Cognition x 2002                     | 0.076  | [0.029; 0.122]   |
| <i>Residual distribution</i>         |        |                  |
| Error std                            | 0.423  | [0.405; 0.441]   |
| <hr/>                                |        |                  |
| <i>ADAMS W2 log interview timing</i> |        |                  |
| Constant                             | -1.995 | [-2.082; -1.908] |
| 2002                                 | 0.075  | [-0.027; 0.178]  |
| Age                                  | 0.028  | [-0.012; 0.068]  |
| Age x 2002                           | -0.047 | [-0.095; 0.001]  |
| Cognition                            | 0.017  | [-0.027; 0.061]  |
| Cognition x 2002                     | -0.036 | [-0.092; 0.019]  |
| <i>Residual distribution</i>         |        |                  |
| Error std                            | 0.113  | [0.103; 0.123]   |
| <hr/>                                |        |                  |
| <i>ADAMS W3 log interview timing</i> |        |                  |
| Constant                             | -0.661 | [-0.768; -0.553] |
| 2002                                 | -0.163 | [-0.283; -0.042] |
| Age                                  | -0.018 | [-0.065; 0.028]  |
| Age x 2002                           | -0.018 | [-0.071; 0.035]  |
| Cognition                            | -0.018 | [-0.061; 0.025]  |
| Cognition x 2002                     | -0.010 | [-0.059; 0.04]   |
| <i>Residual distribution</i>         |        |                  |
| Error std                            | 0.124  | [0.114; 0.133]   |

ADAMS W4 log interview timing

|                              |        |                  |
|------------------------------|--------|------------------|
| Constant                     | -0.290 | [-0.41; -0.17]   |
| 2002                         | -0.222 | [-0.353; -0.09]  |
| Age                          | -0.027 | [-0.081; 0.027]  |
| Age x 2002                   | 0.004  | [-0.056; 0.065]  |
| Cognition                    | -0.055 | [-0.103; -0.006] |
| Cognition x 2002             | 0.036  | [-0.018; 0.091]  |
| <i>Residual distribution</i> |        |                  |
| Error std                    | 0.096  | [0.087; 0.105]   |

Survival

*Coefficients in log shape parameter*

|                                          |        |                  |
|------------------------------------------|--------|------------------|
| Constant                                 | -2.338 | [-2.441; -2.235] |
| Female                                   | -0.524 | [-0.574; -0.473] |
| Non-Hispanic Black                       | 0.080  | [0.009; 0.152]   |
| Non-Hispanic other                       | 0.009  | [-0.176; 0.194]  |
| Hispanic                                 | -0.126 | [-0.232; -0.019] |
| High school dropout                      | 0.250  | [0.187; 0.313]   |
| Some college                             | -0.054 | [-0.127; 0.02]   |
| College or more                          | -0.251 | [-0.331; -0.171] |
| Foreign born                             | -0.295 | [-0.396; -0.195] |
| Lowest Social Security income quartile   | 0.189  | [0.118; 0.26]    |
| 3rd Social Security income quartile      | -0.093 | [-0.163; -0.024] |
| Highest Social Security income quartile  | -0.174 | [-0.249; -0.099] |
| Birthyear (decades after 1930, BY)       | -0.067 | [-0.145; 0.012]  |
| BY x female                              | 0.001  | [-0.048; 0.05]   |
| BY x Non-Hispanic Black                  | 0.067  | [-0.001; 0.135]  |
| BY x Non-Hispanic other                  | 0.018  | [-0.17; 0.205]   |
| BY x Hispanic                            | -0.018 | [-0.119; 0.084]  |
| BY x High school dropout                 | 0.085  | [0.024; 0.146]   |
| BY x Some college                        | 0.019  | [-0.053; 0.091]  |
| BY x College or more                     | -0.105 | [-0.187; -0.024] |
| BY x Foreign born                        | -0.086 | [-0.173; 0.001]  |
| BY x Lowest Social Security income q.    | 0.093  | [0.028; 0.158]   |
| BY x 3rd Social Security income quartile | 0.022  | [-0.048; 0.092]  |
| BY x Highest Social Security income q.   | -0.011 | [-0.084; 0.062]  |
| Random intercept in cognition            | -0.535 | [-0.58; -0.49]   |
| Random growth in cognition               | -0.565 | [-0.621; -0.51]  |
| <i>Other parameters</i>                  |        |                  |
| Scale parameter                          | 1.392  | [1.338; 1.445]   |

ADAMS W1 non-response

|           |        |                 |
|-----------|--------|-----------------|
| Constant  | -0.042 | [-0.233; 0.149] |
| Age       | 0.100  | [-0.001; 0.202] |
| Cognition | 0.032  | [-0.026; 0.089] |

ADAMS W2 non-response

|           |       |                 |
|-----------|-------|-----------------|
| Constant  | 0.512 | [-0.056; 1.079] |
| Age       | 0.218 | [-0.066; 0.503] |
| Cognition | 0.272 | [-0.034; 0.577] |

ADAMS W3 non-response

|                              |        |                 |
|------------------------------|--------|-----------------|
| Constant                     | 0.717  | [0.117; 1.317]  |
| Age                          | 0.033  | [-0.251; 0.318] |
| Cognition                    | 0.155  | [-0.042; 0.353] |
| <hr/>                        |        |                 |
| <i>ADAMS W4 non-response</i> |        |                 |
| Constant                     | 0.810  | [-0.101; 1.721] |
| Age                          | -0.004 | [-0.408; 0.4]   |
| Cognition                    | 0.323  | [0.013; 0.633]  |
| <hr/>                        |        |                 |

**Table S14.** Output of the model estimated on a synthetic dataset and comparisons to the actual coefficients.

|                                         | Actual | Estimated | 95% CI           |
|-----------------------------------------|--------|-----------|------------------|
| <i><u>Latent cognition</u></i>          |        |           |                  |
| Constant                                | 0.800  | 0.801     | [0.756; 0.845]   |
| Female                                  | 0.100  | 0.099     | [0.072; 0.127]   |
| Non-Hispanic Black                      | -0.100 | -0.092    | [-0.132; -0.051] |
| Non-Hispanic other                      | -0.050 | -0.089    | [-0.157; -0.021] |
| Hispanic                                | 0.000  | 0.017     | [-0.019; 0.054]  |
| High school dropout                     | -0.010 | -0.030    | [-0.073; 0.012]  |
| Some college                            | 0.020  | 0.005     | [-0.035; 0.046]  |
| College or more                         | 0.030  | 0.001     | [-0.039; 0.041]  |
| Foreign born                            | -0.050 | -0.055    | [-0.083; -0.028] |
| Lowest Social Security income quartile  | -0.050 | -0.065    | [-0.105; -0.025] |
| 3rd Social Security income quartile     | 0.050  | 0.038     | [-0.004; 0.079]  |
| Highest Social Security income quartile | 0.050  | 0.074     | [0.034; 0.114]   |
| Single                                  | -0.100 | -0.092    | [-0.115; -0.07]  |
| Had a stroke                            | -0.500 | -0.470    | [-0.499; -0.441] |
| Birthyear (decades after 1930, BY)      | 0.010  | 0.015     | [-0.018; 0.049]  |
| BY x female                             | 0.050  | 0.047     | [0.027; 0.068]   |
| BY x Non-Hispanic Black                 | -0.010 | -0.024    | [-0.053; 0.005]  |
| BY x Non-Hispanic other                 | -0.005 | -0.004    | [-0.055; 0.046]  |
| BY x Hispanic                           | 0.000  | -0.015    | [-0.042; 0.012]  |
| BY x High school dropout                | -0.050 | -0.058    | [-0.088; -0.027] |
| BY x Some college                       | 0.100  | 0.107     | [0.077; 0.136]   |
| BY x College or more                    | 0.200  | 0.209     | [0.18; 0.238]    |
| BY x Foreign born                       | -0.100 | -0.108    | [-0.128; -0.087] |
| BY x Lowest Social Security income q.   | -0.050 | -0.036    | [-0.065; -0.007] |
| BY x 3rd Social Security income q.      | 0.100  | 0.113     | [0.084; 0.143]   |
| BY x Highest Social Security income q.  | 0.200  | 0.179     | [0.15; 0.208]    |
| BY x Single                             | -0.020 | -0.022    | [-0.036; -0.007] |
| BY x Had a stroke                       | -0.050 | -0.059    | [-0.076; -0.042] |
| Age (decades after 65)                  | -0.100 | -0.101    | [-0.122; -0.079] |
| Age squared                             | -0.050 | -0.064    | [-0.081; -0.047] |
| Age cube                                | 0.000  | 0.003     | [-0.01; 0.016]   |
| BY x Age                                | -0.050 | -0.060    | [-0.079; -0.041] |
| BY x Age squared                        | -0.020 | -0.014    | [-0.032; 0.003]  |
| BY x Age cube                           | 0.000  | -0.002    | [-0.007; 0.003]  |
| <i><u>Residual distribution</u></i>     |        |           |                  |
| Random intercept std                    | 0.700  | 0.692     | [0.675; 0.709]   |
| Random growth std                       | 0.600  | 0.598     | [0.581; 0.615]   |
| Intercept-growth correlation            | 0.500  | 0.509     | [0.493; 0.524]   |
| Error std                               | 0.100  | 0.106     | [0.098; 0.113]   |
| <i><u>Proxy selection</u></i>           |        |           |                  |
| Constant                                | 0.000  | -0.011    | [-0.061; 0.04]   |
| Female                                  | 0.100  | 0.109     | [0.087; 0.13]    |
| Non-Hispanic Black                      | -0.200 | -0.212    | [-0.245; -0.178] |
| Non-Hispanic other                      | -0.100 | -0.163    | [-0.216; -0.11]  |

|                                         |        |        |                  |
|-----------------------------------------|--------|--------|------------------|
| Hispanic                                | 0.000  | 0.036  | [0.007; 0.065]   |
| High school dropout                     | -0.100 | -0.085 | [-0.116; -0.053] |
| Some college                            | -0.200 | -0.195 | [-0.226; -0.164] |
| College or more                         | -0.300 | -0.295 | [-0.327; -0.264] |
| Foreign born                            | 0.200  | 0.190  | [0.167; 0.212]   |
| Lowest Social Security income quartile  | -0.100 | -0.097 | [-0.129; -0.065] |
| 3rd Social Security income quartile     | -0.200 | -0.174 | [-0.205; -0.142] |
| Highest Social Security income quartile | -0.300 | -0.309 | [-0.341; -0.277] |
| Single                                  | -0.200 | -0.201 | [-0.226; -0.177] |
| Had a stroke                            | 0.200  | 0.231  | [0.202; 0.259]   |
| Survey wave 2002                        | 0.000  | 0.025  | [-0.025; 0.074]  |
| Survey wave 2004                        | 0.000  | 0.000  | [-0.049; 0.049]  |
| Survey wave 2006                        | 0.000  | -0.002 | [-0.05; 0.046]   |
| Survey wave 2008                        | 0.000  | 0.014  | [-0.033; 0.062]  |
| Survey wave 2010                        | -0.200 | -0.166 | [-0.217; -0.116] |
| Survey wave 2012                        | -0.200 | -0.196 | [-0.247; -0.145] |
| Survey wave 2014                        | -0.200 | -0.188 | [-0.239; -0.138] |
| Survey wave 2016                        | -0.200 | -0.183 | [-0.234; -0.132] |
| Age (decades after 65)                  | 0.100  | 0.094  | [0.075; 0.113]   |
| Age squared                             | 0.100  | 0.092  | [0.069; 0.114]   |
| Age cube                                | 0.100  | 0.106  | [0.095; 0.117]   |
| Cognition                               | -0.500 | -0.502 | [-0.539; -0.464] |
| Cognition x 2002                        | 0.000  | -0.026 | [-0.074; 0.023]  |
| Cognition x 2004                        | 0.000  | -0.005 | [-0.052; 0.043]  |
| Cognition x 2006                        | 0.000  | -0.009 | [-0.056; 0.038]  |
| Cognition x 2008                        | 0.000  | -0.003 | [-0.048; 0.043]  |
| Cognition x 2010                        | -0.500 | -0.532 | [-0.588; -0.476] |
| Cognition x 2012                        | -0.500 | -0.532 | [-0.588; -0.476] |
| Cognition x 2014                        | -0.500 | -0.500 | [-0.554; -0.446] |
| Cognition x 2016                        | -0.500 | -0.544 | [-0.6; -0.489]   |
| <i><u>Subjective limitations</u></i>    |        |        |                  |
| Constant                                | 6.000  | 5.993  | [5.953; 6.032]   |
| Female                                  | 0.500  | 0.483  | [0.461; 0.505]   |
| Non-Hispanic Black                      | 0.100  | 0.114  | [0.08; 0.148]    |
| Non-Hispanic other                      | 0.100  | 0.060  | [0.006; 0.114]   |
| Hispanic                                | 0.100  | 0.120  | [0.09; 0.15]     |
| High school dropout                     | 0.150  | 0.148  | [0.116; 0.181]   |
| Some college                            | 0.150  | 0.146  | [0.115; 0.177]   |
| College or more                         | 0.150  | 0.150  | [0.118; 0.182]   |
| Foreign born                            | 0.150  | 0.142  | [0.119; 0.165]   |
| Lowest Social Security income quartile  | 0.200  | 0.196  | [0.164; 0.229]   |
| 3rd Social Security income quartile     | 0.200  | 0.208  | [0.175; 0.24]    |
| Highest Social Security income quartile | 0.200  | 0.198  | [0.165; 0.23]    |
| Single                                  | 0.100  | 0.106  | [0.082; 0.13]    |
| Had a stroke                            | 0.100  | 0.131  | [0.101; 0.161]   |
| Age (decades after 65)                  | 0.300  | 0.296  | [0.28; 0.312]    |
| Cognition                               | -1.000 | -0.998 | [-1.022; -0.975] |
| <i>Residual distribution</i>            |        |        |                  |
| Error std                               | 1.000  | 0.998  | [0.994; 1.003]   |

|                                         |        |        |                  |
|-----------------------------------------|--------|--------|------------------|
| <i>Immediate word recall</i>            |        |        |                  |
| Constant                                | 6.000  | 5.970  | [5.922; 6.019]   |
| Female                                  | -0.500 | -0.501 | [-0.525; -0.476] |
| Non-Hispanic Black                      | 0.100  | 0.120  | [0.083; 0.157]   |
| Non-Hispanic other                      | 0.100  | 0.132  | [0.074; 0.191]   |
| Hispanic                                | 0.100  | 0.096  | [0.063; 0.129]   |
| High school dropout                     | 0.150  | 0.164  | [0.127; 0.202]   |
| Some college                            | 0.150  | 0.150  | [0.115; 0.185]   |
| College or more                         | 0.150  | 0.149  | [0.112; 0.185]   |
| Foreign born                            | 0.150  | 0.170  | [0.144; 0.195]   |
| Lowest Social Security income quartile  | 0.200  | 0.221  | [0.183; 0.258]   |
| 3rd Social Security income quartile     | 0.200  | 0.227  | [0.19; 0.263]    |
| Highest Social Security income quartile | 0.200  | 0.222  | [0.186; 0.259]   |
| Single                                  | 0.100  | 0.113  | [0.086; 0.141]   |
| Had a stroke                            | 0.100  | 0.069  | [0.036; 0.103]   |
| Age (decades after 65)                  | 0.300  | 0.303  | [0.284; 0.322]   |
| First time responder                    | -1.000 | -1.005 | [-1.025; -0.984] |
| Cognition                               | 1.000  | 1.001  | [0.976; 1.026]   |
| <i>Residual distribution</i>            |        |        |                  |
| Error std                               | 1.000  | 1.002  | [0.997; 1.008]   |
| <i>Delayed word recall</i>              |        |        |                  |
| Constant                                | -2.000 | -1.999 | [-2.065; -1.934] |
| Female                                  | -0.500 | -0.486 | [-0.505; -0.467] |
| Non-Hispanic Black                      | 0.100  | 0.088  | [0.061; 0.116]   |
| Non-Hispanic other                      | 0.100  | 0.114  | [0.071; 0.157]   |
| Hispanic                                | 0.100  | 0.087  | [0.062; 0.112]   |
| High school dropout                     | 0.150  | 0.157  | [0.127; 0.186]   |
| Some college                            | 0.150  | 0.147  | [0.119; 0.175]   |
| College or more                         | 0.150  | 0.158  | [0.13; 0.186]    |
| Foreign born                            | 0.150  | 0.151  | [0.131; 0.17]    |
| Lowest Social Security income quartile  | 0.200  | 0.199  | [0.17; 0.227]    |
| 3rd Social Security income quartile     | 0.200  | 0.186  | [0.158; 0.214]   |
| Highest Social Security income quartile | 0.200  | 0.205  | [0.177; 0.232]   |
| Single                                  | -0.100 | -0.104 | [-0.125; -0.083] |
| Had a stroke                            | -0.100 | -0.125 | [-0.151; -0.1]   |
| Age (decades after 65)                  | 0.300  | 0.293  | [0.279; 0.308]   |
| First time responder                    | -1.000 | -1.012 | [-1.034; -0.99]  |
| Immediate word recall                   | 0.500  | 0.504  | [0.495; 0.513]   |
| Cognition                               | 0.500  | 0.491  | [0.471; 0.51]    |
| <i>Residual distribution</i>            |        |        |                  |
| Error std                               | 1.000  | 1.000  | [0.994; 1.006]   |
| <i>Serial 7</i>                         |        |        |                  |
| Constant                                | 3.000  | 3.014  | [2.977; 3.05]    |
| Female                                  | -0.500 | -0.514 | [-0.532; -0.497] |
| Non-Hispanic Black                      | 0.100  | 0.082  | [0.055; 0.108]   |
| Non-Hispanic other                      | 0.100  | 0.136  | [0.094; 0.178]   |
| Hispanic                                | 0.100  | 0.091  | [0.067; 0.115]   |
| High school dropout                     | 0.150  | 0.166  | [0.138; 0.193]   |
| Some college                            | 0.150  | 0.162  | [0.135; 0.188]   |



|                                         |        |        |                  |
|-----------------------------------------|--------|--------|------------------|
| College or more                         | 0.150  | 0.162  | [0.135; 0.188]   |
| Foreign born                            | 0.150  | 0.151  | [0.132; 0.169]   |
| Lowest Social Security income quartile  | 0.200  | 0.196  | [0.169; 0.223]   |
| 3rd Social Security income quartile     | 0.200  | 0.192  | [0.165; 0.218]   |
| Highest Social Security income quartile | 0.200  | 0.200  | [0.174; 0.227]   |
| Single                                  | 0.100  | 0.095  | [0.075; 0.114]   |
| Had a stroke                            | -0.100 | -0.137 | [-0.163; -0.111] |
| Age (decades after 65)                  | 0.300  | 0.309  | [0.295; 0.323]   |
| First time responder                    | -1.000 | -0.985 | [-1.004; -0.967] |
| Cognition                               | 0.500  | 0.496  | [0.48; 0.512]    |
| <i>Residual distribution</i>            |        |        |                  |
| Error std                               | 1.000  | 1.002  | [0.997; 1.008]   |
| <hr/> <i>Mental status</i>              |        |        |                  |
| Constant                                | 7.000  | 6.965  | [6.918; 7.013]   |
| Female                                  | -0.500 | -0.492 | [-0.516; -0.468] |
| Non-Hispanic Black                      | 0.100  | 0.113  | [0.076; 0.149]   |
| Non-Hispanic other                      | 0.100  | 0.181  | [0.123; 0.239]   |
| Hispanic                                | 0.100  | 0.086  | [0.054; 0.118]   |
| High school dropout                     | 0.150  | 0.182  | [0.146; 0.218]   |
| Some college                            | 0.150  | 0.155  | [0.12; 0.189]    |
| College or more                         | 0.150  | 0.166  | [0.13; 0.201]    |
| Foreign born                            | 0.150  | 0.182  | [0.157; 0.207]   |
| Lowest Social Security income quartile  | 0.200  | 0.213  | [0.177; 0.25]    |
| 3rd Social Security income quartile     | 0.200  | 0.211  | [0.175; 0.247]   |
| Highest Social Security income quartile | 0.200  | 0.201  | [0.166; 0.237]   |
| Single                                  | -0.100 | -0.107 | [-0.134; -0.081] |
| Had a stroke                            | 0.100  | 0.072  | [0.038; 0.106]   |
| Age (decades after 65)                  | 0.300  | 0.292  | [0.273; 0.311]   |
| First time responder                    | -1.000 | -0.996 | [-1.015; -0.977] |
| Cognition                               | 1.000  | 1.002  | [0.976; 1.029]   |
| <i>Residual distribution</i>            |        |        |                  |
| Error std                               | 1.000  | 0.999  | [0.993; 1.006]   |
| <hr/> <i>Interviewer assessment</i>     |        |        |                  |
| Constant                                | 0.500  | 0.481  | [0.453; 0.51]    |
| Female                                  | 0.500  | 0.509  | [0.49; 0.527]    |
| Non-Hispanic Black                      | 0.100  | 0.085  | [0.057; 0.113]   |
| Non-Hispanic other                      | 0.100  | 0.073  | [0.03; 0.117]    |
| Hispanic                                | 0.100  | 0.115  | [0.092; 0.138]   |
| High school dropout                     | 0.150  | 0.139  | [0.114; 0.163]   |
| Some college                            | 0.150  | 0.150  | [0.125; 0.174]   |
| College or more                         | 0.150  | 0.148  | [0.122; 0.173]   |
| Foreign born                            | 0.150  | 0.150  | [0.132; 0.167]   |
| Lowest Social Security income quartile  | 0.200  | 0.205  | [0.181; 0.229]   |
| 3rd Social Security income quartile     | 0.200  | 0.222  | [0.197; 0.247]   |
| Highest Social Security income quartile | 0.200  | 0.222  | [0.196; 0.248]   |
| Single                                  | -0.100 | -0.105 | [-0.124; -0.085] |
| Had a stroke                            | 0.100  | 0.120  | [0.099; 0.141]   |
| Age (decades after 65)                  | 0.300  | 0.310  | [0.299; 0.322]   |
| Cognition                               | -0.500 | -0.506 | [-0.522; -0.49]  |

|                                         |        |        |                  |
|-----------------------------------------|--------|--------|------------------|
| <i>Residual distribution</i>            |        |        |                  |
| Error std                               | 0.500  | 0.498  | [0.49; 0.506]    |
| <i>Proxy-reported problems</i>          |        |        |                  |
| Constant                                | 1.000  | 1.002  | [0.95; 1.053]    |
| Female                                  | 0.500  | 0.513  | [0.482; 0.544]   |
| Non-Hispanic Black                      | 0.100  | 0.118  | [0.069; 0.168]   |
| Non-Hispanic other                      | 0.100  | 0.083  | [0.005; 0.161]   |
| Hispanic                                | 0.100  | 0.085  | [0.043; 0.127]   |
| High school dropout                     | 0.150  | 0.163  | [0.119; 0.207]   |
| Some college                            | 0.150  | 0.175  | [0.131; 0.219]   |
| College or more                         | 0.150  | 0.158  | [0.113; 0.204]   |
| Foreign born                            | 0.150  | 0.135  | [0.103; 0.167]   |
| Lowest Social Security income quartile  | 0.200  | 0.181  | [0.137; 0.225]   |
| 3rd Social Security income quartile     | 0.200  | 0.212  | [0.168; 0.257]   |
| Highest Social Security income quartile | 0.200  | 0.196  | [0.15; 0.243]    |
| Single                                  | 0.100  | 0.072  | [0.037; 0.107]   |
| Had a stroke                            | -0.100 | -0.085 | [-0.123; -0.047] |
| Age (decades after 65)                  | 0.300  | 0.304  | [0.284; 0.324]   |
| Cognition                               | -1.000 | -1.019 | [-1.048; -0.989] |
| <i>Residual distribution</i>            |        |        |                  |
| Error std                               | 1.000  | 1.000  | [0.99; 1.01]     |
| <i>Subjective limitations missing</i>   |        |        |                  |
| Constant                                | -2.000 | -1.988 | [-2.057; -1.92]  |
| Female                                  | 0.300  | 0.293  | [0.264; 0.322]   |
| Non-Hispanic Black                      | 0.500  | 0.511  | [0.469; 0.553]   |
| Non-Hispanic other                      | 0.500  | 0.445  | [0.38; 0.51]     |
| Hispanic                                | 0.500  | 0.531  | [0.493; 0.569]   |
| High school dropout                     | 0.600  | 0.587  | [0.539; 0.634]   |
| Some college                            | 0.700  | 0.690  | [0.644; 0.735]   |
| College or more                         | 0.800  | 0.783  | [0.737; 0.829]   |
| Foreign born                            | 0.700  | 0.681  | [0.65; 0.712]    |
| Lowest Social Security income quartile  | 0.100  | 0.104  | [0.06; 0.147]    |
| 3rd Social Security income quartile     | 0.200  | 0.190  | [0.147; 0.234]   |
| Highest Social Security income quartile | 0.300  | 0.271  | [0.228; 0.314]   |
| Single                                  | 0.200  | 0.190  | [0.158; 0.221]   |
| Had a stroke                            | 0.300  | 0.341  | [0.306; 0.376]   |
| 2002 wave                               | 0.000  | 0.033  | [-0.023; 0.089]  |
| 2004 wave                               | 0.000  | 0.009  | [-0.046; 0.065]  |
| 2006 wave                               | 0.000  | 0.027  | [-0.028; 0.082]  |
| 2008 wave                               | -1.000 | -0.980 | [-1.039; -0.921] |
| 2010 wave                               | -1.000 | -0.981 | [-1.039; -0.923] |
| 2012 wave                               | -1.000 | -1.004 | [-1.062; -0.945] |
| 2014 wave                               | -1.000 | -0.987 | [-1.044; -0.929] |
| 2016 wave                               | -1.000 | -0.999 | [-1.058; -0.941] |
| Age (decades after 65)                  | 0.300  | 0.305  | [0.286; 0.325]   |
| Cognition                               | -1.000 | -1.004 | [-1.065; -0.943] |
| Cognition x 2002 wave                   | 0.000  | -0.021 | [-0.098; 0.056]  |
| Cognition x 2004 wave                   | 0.000  | 0.018  | [-0.056; 0.091]  |
| Cognition x 2006 wave                   | 0.000  | 0.009  | [-0.064; 0.082]  |

|                                             |        |        |                  |
|---------------------------------------------|--------|--------|------------------|
| Cognition x 2008 wave                       | 0.300  | 0.274  | [0.198; 0.349]   |
| Cognition x 2010 wave                       | 0.300  | 0.299  | [0.225; 0.373]   |
| Cognition x 2012 wave                       | 0.200  | 0.183  | [0.107; 0.258]   |
| Cognition x 2014 wave                       | 0.200  | 0.244  | [0.171; 0.318]   |
| Cognition x 2016 wave                       | 0.100  | 0.084  | [0.007; 0.161]   |
| <i><u>Immediate word recall missing</u></i> |        |        |                  |
| Constant                                    | 2.000  | 1.932  | [1.85; 2.014]    |
| Female                                      | -0.300 | -0.302 | [-0.328; -0.275] |
| Non-Hispanic Black                          | -0.500 | -0.479 | [-0.519; -0.439] |
| Non-Hispanic other                          | -0.500 | -0.540 | [-0.605; -0.475] |
| Hispanic                                    | -0.400 | -0.357 | [-0.393; -0.321] |
| High school dropout                         | -0.500 | -0.511 | [-0.55; -0.472]  |
| Some college                                | -0.600 | -0.592 | [-0.629; -0.554] |
| College or more                             | -0.600 | -0.604 | [-0.642; -0.566] |
| Foreign born                                | -0.600 | -0.627 | [-0.654; -0.599] |
| Lowest Social Security income quartile      | -0.100 | -0.078 | [-0.117; -0.039] |
| 3rd Social Security income quartile         | -0.200 | -0.207 | [-0.246; -0.169] |
| Highest Social Security income quartile     | -0.300 | -0.293 | [-0.331; -0.254] |
| Single                                      | 0.200  | 0.199  | [0.17; 0.227]    |
| Had a stroke                                | -0.300 | -0.292 | [-0.328; -0.255] |
| 2002 wave                                   | 0.000  | 0.048  | [-0.034; 0.129]  |
| 2004 wave                                   | 0.000  | 0.072  | [-0.009; 0.154]  |
| 2006 wave                                   | 0.000  | 0.074  | [-0.006; 0.154]  |
| 2008 wave                                   | -1.000 | -0.918 | [-0.997; -0.838] |
| 2010 wave                                   | -1.000 | -0.937 | [-1.018; -0.856] |
| 2012 wave                                   | -1.000 | -0.930 | [-1.012; -0.849] |
| 2014 wave                                   | -1.000 | -0.936 | [-1.017; -0.855] |
| 2016 wave                                   | -1.000 | -0.860 | [-0.943; -0.778] |
| Age (decades after 65)                      | 0.300  | 0.308  | [0.288; 0.329]   |
| First self-interview in HRS                 | -0.500 | -0.501 | [-0.534; -0.467] |
| Cognition                                   | -1.000 | -0.974 | [-1.038; -0.911] |
| Cognition x 2002 wave                       | 0.000  | 0.004  | [-0.076; 0.083]  |
| Cognition x 2004 wave                       | 0.100  | 0.053  | [-0.025; 0.131]  |
| Cognition x 2006 wave                       | 0.500  | 0.474  | [0.401; 0.546]   |
| Cognition x 2008 wave                       | 0.500  | 0.475  | [0.401; 0.549]   |
| Cognition x 2010 wave                       | 0.100  | 0.045  | [-0.035; 0.125]  |
| Cognition x 2012 wave                       | 0.000  | -0.056 | [-0.137; 0.025]  |
| Cognition x 2014 wave                       | 0.100  | 0.065  | [-0.013; 0.144]  |
| Cognition x 2016 wave                       | 0.000  | -0.090 | [-0.172; -0.007] |
| <i><u>Delayed word recall missing</u></i>   |        |        |                  |
| Constant                                    | 2.000  | 1.609  | [1.442; 1.777]   |
| Female                                      | -0.300 | -0.274 | [-0.302; -0.246] |
| Non-Hispanic Black                          | -0.400 | -0.425 | [-0.462; -0.387] |
| Non-Hispanic other                          | -0.400 | -0.443 | [-0.504; -0.382] |
| Hispanic                                    | -0.300 | -0.311 | [-0.345; -0.277] |
| High school dropout                         | -0.400 | -0.447 | [-0.482; -0.411] |
| Some college                                | -0.700 | -0.703 | [-0.739; -0.667] |
| College or more                             | -0.800 | -0.820 | [-0.856; -0.784] |
| Foreign born                                | -0.800 | -0.792 | [-0.818; -0.765] |

|                                         |        |        |                  |
|-----------------------------------------|--------|--------|------------------|
| Lowest Social Security income quartile  | -0.200 | -0.213 | [-0.25; -0.176]  |
| 3rd Social Security income quartile     | -0.200 | -0.186 | [-0.222; -0.15]  |
| Highest Social Security income quartile | -0.200 | -0.199 | [-0.235; -0.164] |
| Single                                  | 0.200  | 0.213  | [0.186; 0.239]   |
| Had a stroke                            | -0.300 | -0.289 | [-0.323; -0.255] |
| 2002 wave                               | 0.000  | -0.067 | [-0.151; 0.016]  |
| 2004 wave                               | 0.000  | -0.009 | [-0.093; 0.075]  |
| 2006 wave                               | 0.000  | -0.017 | [-0.102; 0.068]  |
| 2008 wave                               | -1.000 | -1.055 | [-1.143; -0.966] |
| 2010 wave                               | -1.000 | -1.058 | [-1.146; -0.97]  |
| 2012 wave                               | -1.000 | -1.035 | [-1.122; -0.947] |
| 2014 wave                               | -1.000 | -1.033 | [-1.12; -0.946]  |
| 2016 wave                               | -1.000 | -1.041 | [-1.128; -0.955] |
| Age (decades after 65)                  | 0.300  | 0.284  | [0.264; 0.304]   |
| First self-interview in HRS             | -1.000 | -0.908 | [-0.955; -0.861] |
| Immediate word recall                   | -0.100 | -0.032 | [-0.059; -0.004] |
| Immediate word recall missing           | 1.000  | 0.982  | [0.956; 1.007]   |
| Cognition                               | -0.500 | -0.645 | [-0.728; -0.562] |
| Cognition x 2002 wave                   | 0.500  | 0.597  | [0.518; 0.675]   |
| Cognition x 2004 wave                   | 0.500  | 0.566  | [0.489; 0.644]   |
| Cognition x 2006 wave                   | 0.500  | 0.571  | [0.494; 0.648]   |
| Cognition x 2008 wave                   | 0.000  | 0.109  | [0.026; 0.193]   |
| Cognition x 2010 wave                   | 0.000  | 0.126  | [0.044; 0.209]   |
| Cognition x 2012 wave                   | 0.000  | 0.083  | [0.001; 0.165]   |
| Cognition x 2014 wave                   | 0.000  | 0.094  | [0.012; 0.175]   |
| Cognition x 2016 wave                   | 0.000  | 0.087  | [0.005; 0.169]   |
| <hr/> <i>Serial 7 missing</i>           |        |        |                  |
| Constant                                | 2.000  | 1.959  | [1.871; 2.047]   |
| Female                                  | -0.300 | -0.294 | [-0.323; -0.266] |
| Non-Hispanic Black                      | -0.300 | -0.284 | [-0.327; -0.242] |
| Non-Hispanic other                      | -0.500 | -0.558 | [-0.629; -0.487] |
| Hispanic                                | -0.500 | -0.494 | [-0.534; -0.454] |
| High school dropout                     | -0.500 | -0.531 | [-0.572; -0.49]  |
| Some college                            | -0.600 | -0.590 | [-0.629; -0.55]  |
| College or more                         | -0.800 | -0.809 | [-0.85; -0.767]  |
| Foreign born                            | -0.800 | -0.814 | [-0.843; -0.784] |
| Lowest Social Security income quartile  | -0.100 | -0.123 | [-0.165; -0.081] |
| 3rd Social Security income quartile     | -0.200 | -0.219 | [-0.26; -0.178]  |
| Highest Social Security income quartile | -0.300 | -0.307 | [-0.348; -0.265] |
| Single                                  | -0.200 | -0.210 | [-0.241; -0.179] |
| Had a stroke                            | 0.300  | 0.304  | [0.268; 0.341]   |
| 2002 wave                               | 0.000  | 0.054  | [-0.03; 0.138]   |
| 2004 wave                               | 0.000  | 0.041  | [-0.044; 0.127]  |
| 2006 wave                               | 0.000  | 0.012  | [-0.074; 0.098]  |
| 2008 wave                               | -1.000 | -0.978 | [-1.066; -0.89]  |
| 2010 wave                               | -1.000 | -0.914 | [-1.002; -0.827] |
| 2012 wave                               | -1.000 | -0.940 | [-1.027; -0.852] |
| 2014 wave                               | -1.000 | -0.932 | [-1.017; -0.846] |
| 2016 wave                               | -1.000 | -0.900 | [-0.986; -0.814] |

|                                               |        |        |                  |
|-----------------------------------------------|--------|--------|------------------|
| Age (decades after 65)                        | 0.300  | 0.291  | [0.27; 0.313]    |
| First self-interview in HRS                   | -1.000 | -0.971 | [-1.011; -0.93]  |
| Cognition                                     | -1.000 | -1.021 | [-1.096; -0.945] |
| Cognition x 2002 wave                         | 0.000  | 0.020  | [-0.07; 0.11]    |
| Cognition x 2004 wave                         | 0.000  | 0.031  | [-0.058; 0.119]  |
| Cognition x 2006 wave                         | 0.000  | 0.065  | [-0.023; 0.153]  |
| Cognition x 2008 wave                         | 0.000  | 0.059  | [-0.035; 0.153]  |
| Cognition x 2010 wave                         | 0.000  | -0.005 | [-0.099; 0.088]  |
| Cognition x 2012 wave                         | 0.000  | 0.042  | [-0.05; 0.133]   |
| Cognition x 2014 wave                         | 0.300  | 0.310  | [0.225; 0.395]   |
| Cognition x 2016 wave                         | 0.300  | 0.278  | [0.192; 0.363]   |
| <i><u>Mental status missing</u></i>           |        |        |                  |
| Constant                                      | 2.000  | 2.013  | [1.893; 2.133]   |
| Female                                        | -0.300 | -0.311 | [-0.354; -0.267] |
| Non-Hispanic Black                            | -0.500 | -0.507 | [-0.572; -0.441] |
| Non-Hispanic other                            | -0.400 | -0.547 | [-0.652; -0.442] |
| Hispanic                                      | -0.600 | -0.605 | [-0.667; -0.544] |
| High school dropout                           | -0.600 | -0.619 | [-0.682; -0.557] |
| Some college                                  | -0.600 | -0.615 | [-0.676; -0.554] |
| College or more                               | -0.800 | -0.810 | [-0.873; -0.747] |
| Foreign born                                  | -0.800 | -0.800 | [-0.845; -0.754] |
| Lowest Social Security income quartile        | -0.200 | -0.206 | [-0.27; -0.142]  |
| 3rd Social Security income quartile           | -0.200 | -0.160 | [-0.223; -0.096] |
| Highest Social Security income quartile       | -0.300 | -0.302 | [-0.366; -0.239] |
| Single                                        | -0.200 | -0.219 | [-0.266; -0.171] |
| Had a stroke                                  | 0.300  | 0.317  | [0.26; 0.373]    |
| 2002 wave                                     | 0.000  | 0.004  | [-0.093; 0.102]  |
| 2004 wave                                     | 0.000  | 0.034  | [-0.066; 0.134]  |
| 2006 wave                                     | 0.000  | -0.025 | [-0.128; 0.077]  |
| 2008 wave                                     | -1.000 | -0.946 | [-1.051; -0.842] |
| 2010 wave                                     | -1.000 | -0.988 | [-1.093; -0.883] |
| 2012 wave                                     | -1.000 | -0.999 | [-1.106; -0.892] |
| 2014 wave                                     | -1.000 | -1.010 | [-1.117; -0.903] |
| 2016 wave                                     | -1.000 | -1.022 | [-1.13; -0.914]  |
| Age (decades after 65)                        | 0.300  | 0.303  | [0.268; 0.337]   |
| First self-interview in HRS                   | -1.000 | -1.024 | [-1.08; -0.968]  |
| Age exactly 65                                | 1.000  | 1.037  | [0.958; 1.115]   |
| Cognition                                     | -2.000 | -1.954 | [-2.098; -1.809] |
| Cognition x 2002 wave                         | 0.500  | 0.447  | [0.292; 0.602]   |
| Cognition x 2004 wave                         | 0.500  | 0.456  | [0.302; 0.609]   |
| Cognition x 2006 wave                         | 0.500  | 0.447  | [0.294; 0.6]     |
| Cognition x 2008 wave                         | 0.300  | 0.203  | [0.033; 0.372]   |
| Cognition x 2010 wave                         | 0.300  | 0.214  | [0.045; 0.383]   |
| Cognition x 2012 wave                         | 0.000  | -0.031 | [-0.208; 0.146]  |
| Cognition x 2014 wave                         | 0.000  | 0.029  | [-0.147; 0.204]  |
| Cognition x 2016 wave                         | 0.000  | -0.001 | [-0.181; 0.178]  |
| <i><u>Proxy-reported problems missing</u></i> |        |        |                  |
| Constant                                      | -2.000 | -2.018 | [-2.156; -1.88]  |
| Female                                        | 0.200  | 0.244  | [0.18; 0.308]    |

|                                            |        |        |                  |
|--------------------------------------------|--------|--------|------------------|
| Non-Hispanic Black                         | 0.400  | 0.412  | [0.316; 0.508]   |
| Non-Hispanic other                         | 0.400  | 0.282  | [0.133; 0.431]   |
| Hispanic                                   | 0.400  | 0.446  | [0.362; 0.53]    |
| High school dropout                        | 0.500  | 0.484  | [0.387; 0.581]   |
| Some college                               | 0.600  | 0.625  | [0.53; 0.721]    |
| College or more                            | 0.700  | 0.737  | [0.64; 0.834]    |
| Foreign born                               | 0.600  | 0.571  | [0.502; 0.639]   |
| Lowest Social Security income quartile     | 0.200  | 0.171  | [0.079; 0.263]   |
| 3rd Social Security income quartile        | 0.200  | 0.221  | [0.127; 0.314]   |
| Highest Social Security income quartile    | 0.400  | 0.373  | [0.278; 0.468]   |
| Single                                     | -0.200 | -0.190 | [-0.261; -0.12]  |
| Had a stroke                               | -0.300 | -0.194 | [-0.269; -0.12]  |
| 2002 wave                                  | 0.000  | -0.003 | [-0.107; 0.101]  |
| 2004 wave                                  | 0.000  | -0.023 | [-0.127; 0.082]  |
| 2006 wave                                  | 0.000  | -0.015 | [-0.118; 0.088]  |
| 2008 wave                                  | -1.000 | -1.042 | [-1.184; -0.899] |
| 2010 wave                                  | -1.000 | -1.108 | [-1.258; -0.957] |
| 2012 wave                                  | -1.000 | -1.127 | [-1.281; -0.972] |
| 2014 wave                                  | -1.000 | -1.092 | [-1.242; -0.941] |
| 2016 wave                                  | -1.000 | -0.988 | [-1.132; -0.843] |
| Age (decades after 65)                     | 0.300  | 0.287  | [0.244; 0.329]   |
| Cognition                                  | -2.000 | -2.083 | [-2.288; -1.877] |
| Cognition x 2002 wave                      | 0.000  | 0.151  | [-0.099; 0.4]    |
| Cognition x 2004 wave                      | 0.000  | -0.025 | [-0.281; 0.231]  |
| Cognition x 2006 wave                      | 0.000  | 0.123  | [-0.12; 0.365]   |
| Cognition x 2008 wave                      | 0.000  | 0.066  | [-0.2; 0.331]    |
| Cognition x 2010 wave                      | 0.300  | 0.258  | [0; 0.517]       |
| Cognition x 2012 wave                      | 0.200  | 0.167  | [-0.095; 0.428]  |
| Cognition x 2014 wave                      | 0.100  | 0.139  | [-0.123; 0.4]    |
| Cognition x 2016 wave                      | 0.100  | 0.246  | [-0.008; 0.5]    |
| <hr/> <i>ADAMS Selection, 2000, proxy</i>  |        |        |                  |
| Constant                                   | 0.500  | 0.561  | [0.46; 0.662]    |
| Stratum 1                                  | -0.050 | -0.091 | [-0.158; -0.024] |
| <hr/> <i>ADAMS Selection, 2002, proxy</i>  |        |        |                  |
| Constant                                   | 0.000  | -0.052 | [-0.182; 0.077]  |
| Stratum 1                                  | -0.050 | 0.006  | [-0.082; 0.094]  |
| <hr/> <i>ADAMS Selection, 2000, self</i>   |        |        |                  |
| Constant                                   | 0.500  | 0.510  | [0.371; 0.649]   |
| Stratum 1                                  | -0.050 | -0.052 | [-0.074; -0.029] |
| <hr/> <i>ADAMS Selection, 2002, self</i>   |        |        |                  |
| Constant                                   | 0.000  | 0.000  | [-0.187; 0.187]  |
| Stratum 11                                 | -0.050 | -0.046 | [-0.074; -0.019] |
| <hr/> <i>ADAMS W1 log interview timing</i> |        |        |                  |
| Constant                                   | -2.400 | -2.397 | [-2.415; -2.378] |
| 2002                                       | -1.000 | -1.000 | [-1.035; -0.965] |
| Age                                        | 0.100  | 0.088  | [0.075; 0.1]     |
| Age x 2002                                 | 0.000  | 0.021  | [-0.004; 0.047]  |
| Cognition                                  | 0.100  | 0.089  | [0.076; 0.101]   |

|                                            |        |        |                  |
|--------------------------------------------|--------|--------|------------------|
| Cognition x 2002                           | 0.050  | 0.067  | [0.042; 0.091]   |
| <i>Residual distribution</i>               |        |        |                  |
| Error std                                  | 0.300  | 0.285  | [0.279; 0.29]    |
| <hr/> <i>ADAMS W2 log interview timing</i> |        |        |                  |
| Constant                                   | -2.000 | -2.001 | [-2.017; -1.985] |
| 2002                                       | -1.000 | -0.971 | [-1.001; -0.94]  |
| Age                                        | 0.100  | 0.106  | [0.095; 0.117]   |
| Age x 2002                                 | 0.000  | -0.008 | [-0.028; 0.012]  |
| Cognition                                  | 0.100  | 0.073  | [0.053; 0.093]   |
| Cognition x 2002                           | 0.000  | -0.024 | [-0.061; 0.014]  |
| <i>Residual distribution</i>               |        |        |                  |
| Error std                                  | 0.100  | 0.095  | [0.091; 0.099]   |
| <hr/> <i>ADAMS W3 log interview timing</i> |        |        |                  |
| Constant                                   | -1.600 | -1.591 | [-1.601; -1.58]  |
| 2002                                       | -1.000 | -1.014 | [-1.033; -0.994] |
| Age                                        | 0.100  | 0.097  | [0.09; 0.105]    |
| Age x 2002                                 | 0.000  | 0.012  | [-0.002; 0.025]  |
| Cognition                                  | 0.100  | 0.096  | [0.088; 0.104]   |
| Cognition x 2002                           | -0.050 | -0.055 | [-0.07; -0.04]   |
| <i>Residual distribution</i>               |        |        |                  |
| Error std                                  | 0.100  | 0.097  | [0.094; 0.1]     |
| <hr/> <i>ADAMS W4 log interview timing</i> |        |        |                  |
| Constant                                   | -1.200 | -1.200 | [-1.211; -1.19]  |
| 2002                                       | -1.000 | -0.996 | [-1.017; -0.975] |
| Age                                        | 0.100  | 0.097  | [0.089; 0.104]   |
| Age x 2002                                 | 0.000  | 0.005  | [-0.008; 0.018]  |
| Cognition                                  | 0.100  | 0.105  | [0.097; 0.113]   |
| Cognition x 2002                           | 0.000  | -0.007 | [-0.022; 0.009]  |
| <i>Residual distribution</i>               |        |        |                  |
| Error std                                  | 0.100  | 0.098  | [0.095; 0.101]   |
| <hr/> <i>Survival</i>                      |        |        |                  |
| <i>Coefficients in log shape parameter</i> |        |        |                  |
| Constant                                   | -2.000 | -1.951 | [-2.057; -1.846] |
| Female                                     | 0.100  | 0.111  | [0.065; 0.158]   |
| Non-Hispanic Black                         | 0.100  | 0.102  | [0.031; 0.172]   |
| Non-Hispanic other                         | 0.050  | -0.045 | [-0.166; 0.076]  |
| Hispanic                                   | 0.100  | 0.152  | [0.09; 0.213]    |
| High school dropout                        | 0.050  | 0.023  | [-0.044; 0.09]   |
| Some college                               | -0.100 | -0.182 | [-0.252; -0.113] |
| College or more                            | -0.150 | -0.196 | [-0.264; -0.127] |
| Foreign born                               | 0.100  | 0.041  | [-0.007; 0.089]  |
| Lowest Social Security income quartile     | 0.050  | 0.096  | [0.028; 0.163]   |
| 3rd Social Security income quartile        | -0.100 | -0.103 | [-0.172; -0.033] |
| Highest Social Security income quartile    | -0.150 | -0.135 | [-0.205; -0.064] |
| Birthyear (decades after 1930, BY)         | -0.010 | 0.007  | [-0.074; 0.089]  |
| BY x female                                | 0.005  | 0.020  | [-0.024; 0.064]  |
| BY x Non-Hispanic Black                    | 0.010  | -0.016 | [-0.083; 0.05]   |
| BY x Non-Hispanic other                    | 0.005  | -0.121 | [-0.233; -0.008] |

|                                        |        |        |                  |
|----------------------------------------|--------|--------|------------------|
| BY x Hispanic                          | 0.005  | -0.021 | [-0.079; 0.038]  |
| BY x High school dropout               | 0.010  | -0.002 | [-0.065; 0.062]  |
| BY x Some college                      | -0.005 | -0.033 | [-0.097; 0.031]  |
| BY x College or more                   | 0.000  | -0.016 | [-0.079; 0.047]  |
| BY x Foreign born                      | 0.010  | -0.025 | [-0.07; 0.02]    |
| BY x Lowest Social Security income q.  | 0.005  | 0.001  | [-0.063; 0.065]  |
| BY x 3rd Social Security income q.     | -0.010 | -0.021 | [-0.086; 0.043]  |
| BY x Highest Social Security income q. | -0.020 | -0.050 | [-0.115; 0.015]  |
| Random intercept in cognition          | -0.200 | -0.214 | [-0.263; -0.165] |
| Random growth in cognition             | -0.200 | -0.200 | [-0.267; -0.133] |
| <i>Other parameters</i>                |        |        |                  |
| Scale parameter                        | 0.700  | 0.685  | [0.632; 0.738]   |
| <hr/> <i>ADAMS W1 non-response</i>     |        |        |                  |
| Constant                               | 0.000  | -0.010 | [-0.061; 0.041]  |
| Age                                    | -0.100 | -0.101 | [-0.136; -0.066] |
| Cognition                              | 0.100  | 0.108  | [0.075; 0.141]   |
| <hr/> <i>ADAMS W2 non-response</i>     |        |        |                  |
| Constant                               | 0.000  | 0.006  | [-0.126; 0.138]  |
| Age                                    | -0.100 | -0.075 | [-0.159; 0.01]   |
| Cognition                              | 0.100  | 0.066  | [-0.084; 0.216]  |
| <hr/> <i>ADAMS W3 non-response</i>     |        |        |                  |
| Constant                               | 0.000  | 0.022  | [-0.074; 0.117]  |
| Age                                    | -0.100 | -0.105 | [-0.168; -0.041] |
| Cognition                              | 0.300  | 0.316  | [0.246; 0.386]   |
| <hr/> <i>ADAMS W4 non-response</i>     |        |        |                  |
| Constant                               | 0.000  | -0.067 | [-0.167; 0.032]  |
| Age                                    | -0.100 | -0.017 | [-0.081; 0.047]  |
| Cognition                              | 0.300  | 0.275  | [0.206; 0.344]   |



**Table S15.** Actual and estimated prevalence of dementia by age, men, simulated data.

|      | 65-74  |           |                | 75-84  |           |                | 85+    |           |                |
|------|--------|-----------|----------------|--------|-----------|----------------|--------|-----------|----------------|
|      | Actual | Estimated | 95% CI         | Actual | Estimated | 95% CI         | Actual | Estimated | 95% CI         |
| 2000 | 0.128  | 0.125     | [0.115; 0.134] | 0.217  | 0.218     | [0.206; 0.23]  | 0.296  | 0.291     | [0.276; 0.306] |
| 2002 | 0.126  | 0.126     | [0.118; 0.135] | 0.224  | 0.228     | [0.217; 0.239] | 0.282  | 0.287     | [0.273; 0.301] |
| 2004 | 0.126  | 0.126     | [0.117; 0.134] | 0.240  | 0.236     | [0.225; 0.247] | 0.286  | 0.284     | [0.271; 0.298] |
| 2006 | 0.127  | 0.124     | [0.115; 0.132] | 0.238  | 0.235     | [0.224; 0.245] | 0.304  | 0.301     | [0.288; 0.315] |
| 2008 | 0.136  | 0.125     | [0.116; 0.134] | 0.232  | 0.237     | [0.226; 0.248] | 0.316  | 0.307     | [0.294; 0.319] |
| 2010 | 0.132  | 0.124     | [0.115; 0.133] | 0.235  | 0.237     | [0.226; 0.248] | 0.320  | 0.319     | [0.306; 0.332] |
| 2012 | 0.120  | 0.119     | [0.11; 0.128]  | 0.249  | 0.245     | [0.234; 0.256] | 0.325  | 0.318     | [0.305; 0.331] |
| 2014 | 0.119  | 0.118     | [0.109; 0.127] | 0.243  | 0.242     | [0.231; 0.253] | 0.321  | 0.321     | [0.308; 0.335] |
| 2016 | 0.117  | 0.119     | [0.11; 0.129]  | 0.240  | 0.244     | [0.231; 0.256] | 0.323  | 0.322     | [0.309; 0.335] |

**Table S16.** Actual and estimated prevalence of dementia by age, women, simulated data.

|      | 65-74  |           |                | 75-84  |           |                | 85+   |       |                |
|------|--------|-----------|----------------|--------|-----------|----------------|-------|-------|----------------|
|      | Actual | Estimated | 95% CI         | Actual | Estimated | 95% CI         | Mean  | CI    |                |
| 2000 | 0.096  | 0.099     | [0.091; 0.107] | 0.191  | 0.201     | [0.188; 0.213] | 0.233 | 0.235 | [0.219; 0.251] |
| 2002 | 0.093  | 0.099     | [0.091; 0.106] | 0.203  | 0.201     | [0.19; 0.212]  | 0.253 | 0.251 | [0.236; 0.266] |
| 2004 | 0.103  | 0.102     | [0.094; 0.109] | 0.207  | 0.203     | [0.192; 0.213] | 0.248 | 0.250 | [0.236; 0.264] |
| 2006 | 0.093  | 0.097     | [0.089; 0.104] | 0.209  | 0.211     | [0.201; 0.221] | 0.259 | 0.257 | [0.244; 0.271] |
| 2008 | 0.096  | 0.095     | [0.087; 0.103] | 0.207  | 0.213     | [0.202; 0.223] | 0.272 | 0.277 | [0.263; 0.291] |
| 2010 | 0.099  | 0.094     | [0.087; 0.101] | 0.207  | 0.205     | [0.195; 0.216] | 0.290 | 0.286 | [0.272; 0.3]   |
| 2012 | 0.090  | 0.088     | [0.081; 0.095] | 0.213  | 0.207     | [0.197; 0.218] | 0.291 | 0.291 | [0.278; 0.304] |
| 2014 | 0.083  | 0.083     | [0.076; 0.09]  | 0.207  | 0.206     | [0.195; 0.217] | 0.287 | 0.293 | [0.28; 0.306]  |
| 2016 | 0.079  | 0.080     | [0.073; 0.087] | 0.214  | 0.209     | [0.198; 0.221] | 0.296 | 0.293 | [0.281; 0.306] |

**Table S17.** Number and fraction missing cognitive measures in the total sample.

|                                                              | N      | % missing |
|--------------------------------------------------------------|--------|-----------|
| <i>Measures available in both proxy- and self-interviews</i> |        |           |
| Number of interviews                                         | 97,629 |           |
| Missing subjective limitations                               | 208    | 0.2%      |
| <i>Measures available in self-interviews</i>                 |        |           |
| Number of interviews                                         | 88,253 |           |
| Missing immediate word recall                                | 1,352  | 1.5%      |
| Missing delayed word recall                                  | 3,035  | 3.4%      |
| Missing serial 7 subtractions                                | 2,714  | 3.1%      |
| Missing mental status                                        | 1,002  | 1.1%      |
| <i>Measures available in proxy-interviews</i>                |        |           |
| Number of interviews                                         | 9,376  |           |
| Missing interviewer assessment                               | 1      | 0.0%      |
| Missing proxy-reported limitations                           | 534    | 5.7%      |

## SI References

1. Anonymous, RAND HRS Data, Version P.
2. P. Hudomiet, M. D. Hurd, S. Rohwedder (2022) The lifetime risk of living with dementia for short and medium durations based on a longitudinal model of cognition estimated on nationally representative U.S. data. (RAND Corporation).
3. P. Hudomiet, M. D. Hurd, S. Rohwedder, Dementia prevalence in the United States in 2000 and 2012: Estimates based on a nationally representative study. *The Journals of Gerontology. Series B, Psychological Sciences and Social Sciences* **73**, S10-S19 (2018).
4. S. G. Heeringa *et al.* (2009) Aging, Demographics and Memory Study (ADAMS): Sample design, weighting and analysis for ADAMS. (Institute for Social Research, University of Michigan, Ann Arbor, Michigan).
5. B. L. Plassman *et al.*, Prevalence of dementia in the United States: the aging, demographics, and memory study. *Neuroepidemiology* **29**, 125-132 (2007).
6. K. Z. Gianattasio, Q. Wu, M. M. Glymour, M. C. Power, Comparison of methods for algorithmic classification of dementia status in the Health and Retirement Study. *Epidemiology (Cambridge, Mass.)* **30**, 291-302 (2019).
7. K. M. Langa *et al.*, A comparison of the prevalence of dementia in the United States in 2000 and 2012. *JAMA Internal Medicine* **177**, 51-58 (2017).
8. E. M. Crimmins, J. K. Kim, K. M. Langa, D. R. Weir, Assessment of cognition using surveys and neuropsychological assessment: the Health and Retirement Study and the Aging, Demographics, and Memory Study. *Journals of Gerontology Series B: Psychological Sciences and Social Sciences* **66**, i162-i171 (2011).
